## RESEARCH ARTICLE

# Innate visual preferences and behavioral flexibility in *Drosophila*

Martyna J. Grabowska, James Steeves, Julius Alpay, Matthew Van De Poll, Deniz Ertekin and Bruno van Swinderen\*

## ABSTRACT

Visual decision making in animals is influenced by innate preferences as well as experience. Interaction between hard-wired responses and changing motivational states determines whether a visual stimulus is attractive, aversive or neutral. It is, however, difficult to separate the relative contribution of nature versus nurture in experimental paradigms, especially for more complex visual parameters such as the shape of objects. We used a closed-loop virtual reality paradigm for walking *Drosophila* to uncover innate visual preferences for the shape and size of objects, in a recursive choice scenario allowing the flies to reveal their visual preferences over time. We found that *Drosophila melanogaster* display a robust attraction/repulsion profile for a range of object sizes in this paradigm, and that this visual preference profile remains evident under a variety of conditions and persists into old age. We also demonstrate a level of flexibility in this behavior: innate repulsion to certain objects could be transiently overridden if these were novel, although this effect was only evident in younger flies. Finally, we show that a neuromodulatory circuit in the fly brain, *Drosophila* neuropeptide F (dNPF), can be recruited to guide visual decision making. Optogenetic activation of dNPF-expressing neurons converted a visually repulsive object into a more attractive object. This suggests that dNPF activity in the *Drosophila* brain guides ongoing visual choices, to override innate preferences and thereby provide a necessary level of behavioral flexibility in visual decision making.

**KEY WORDS:** Decision making, Insect, Neuropeptide F, Valence, Behavior, Motivation, Virtual reality, Optogenetics

## INTRODUCTION

Animals continuously make decisions to survive in a dynamic environment to, for example, successfully locate an adequate food source, find a way home or avoid something dangerous. Behavioral choices are guided by innate preferences or ‘instinct’, as well as by more flexible cognitive processes such as attention (Smith and Ratcliff, 2009; VanRullen and Thorpe, 2001), learning and memory (Euston et al., 2012; O’Doherty et al., 2017; Odoemene et al., 2018; Tobler et al., 2006). Instinct and experience together determine the valence of stimuli and therefore assign negative or positive associations (Gold and Shadlen, 2007; Lee et al., 2005; Xie and Padoa-Schioppa, 2016). Typically, negative and positive associations to stimuli result in opposing behavioral actions: animals move towards attractive stimuli and away from aversive

stimuli. In animal learning experiments, these rudimentary behaviors are usually tested by using a Pavlovian conditioning paradigm, whereby one of two ‘neutral’ stimuli are provided with a valence cue (a punishment or reward) in order to demonstrate increased attraction (or repulsion) towards that stimulus, compared with the other (Balleine and Dickinson, 1998; Dickinson and Balleine, 2002; Rangel et al., 2008; Tully and Quinn, 1985). However, the valence of stimuli is not necessarily hard wired (Janak and Tye, 2015). Inherently attractive objects can become less attractive over time as a result of habituation or pre-exposure, or can become repulsive if associated with punishment. Similarly, inherently repulsive objects might become transiently worth paying attention to (Redondo et al., 2014). Such flexibility seems to be a feature of all animal brains, to allow for adaptive decision making based on experience.

Recent studies suggest that circuits in the central brain of insects, in the central complex (CC), are involved in decision making (Guo et al., 2016; Sun et al., 2017). These insect circuits display some functional similarities to the mammalian basal ganglia (Anderson et al., 2014; Barron et al., 2015; Stephenson-Jones et al., 2011; Strausfeld and Hirth, 2013), especially with regard to the regulation of valence-based decision making (Foti et al., 2011; Gold and Shadlen, 2007; Guitart-Masip et al., 2012; O’Doherty et al., 2017; Rangel et al., 2008; VanRullen and Thorpe, 2001). Also, like the basal ganglia, the insect CC is involved in multisensory integration; it is understood to be involved in sleep (Donlea et al., 2011, 2018; Nitz et al., 2002), learning and memory (Krashes et al., 2009; Liu et al., 2006; Rohwedder et al., 2015; Weir et al., 2014; Zhang et al., 2013), navigation and orientation (Seelig and Jayaraman, 2015), and action selection (Barron and Klein, 2016; Barron et al., 2015; Gerfen and Surmeier, 2011; Gurney et al., 2001). These diverse functions are regulated in the brain for both mammals and insects by monoamines (Göttsche and Woldbye, 2016; Ichinose et al., 2015; Kahsai and Winther, 2011; Keene and Waddell, 2007; Waddell, 2010; Weir et al., 2014), gamma-aminobutyric acid (GABA) (Guo et al., 2016; Gurney et al., 2001; Root et al., 2008; Zhang et al., 2013) and neuropeptides (Bannon et al., 2000; Chung et al., 2017; Göttsche and Woldbye, 2016; Krashes et al., 2009; Shao et al., 2017). Whether these neuromodulators and neuropeptides play a direct role in controlling valence-based decision making in the insect CC remains unclear.

*Drosophila* neuropeptide F (dNPF) is the homolog of mammalian neuropeptide Y (NPY) (Garczynski et al., 2002), which is involved in signaling food satiety levels as well as regulation of fear and anxiety (Göttsche and Woldbye, 2016; Primeaux et al., 2005; Redrobe et al., 2002). In *Drosophila*, an increase in dNPF levels in the brain has been associated with increased aggression (Dierick and Greenspan, 2007), arousal (Chung et al., 2017) and reward learning (Krashes et al., 2009; Shao et al., 2017). Further, dNPF modulates olfactory learning by inhibiting dopaminergic neurons that provide positive and negative valence cues to the mushroom body (MB) (Hattori et al., 2017;

Queensland Brain Institute, The University of Queensland, St Lucia, QLD 4072, Australia.

\*Author for correspondence (b.vanswinderen@uq.edu.au)

© M.J.G., 0000-0002-1727-7714; M.V.D.P., 0000-0002-6524-1919; D.E., 0000-0001-9480-8622; B.v.S., 0000-0001-6552-7418

Received 1 June 2018; Accepted 10 October 2018

Krashes et al., 2009; Zhang et al., 2007), a structure that has primarily been associated with olfactory memory (Keene and Waddell, 2007). Interestingly, dNPF-expressing neurons also project to the fan-shaped body (FB) (Kahsai and Winther, 2011; Krashes et al., 2009), a CC neuropil associated with arousal (Donlea et al., 2011; Liu et al., 2012) as well as visual behavior (Liu et al., 2006; Weir et al., 2014). This suggests that dNPF might provide valence cues for visual stimuli, in order to guide visual decision making.

In this study, we investigated visual preferences in *Drosophila*, to study flexibility in valence-based choice behavior along one visual stimulus parameter: object height. Using a closed-loop virtual reality arena for tethered, walking flies, we found that flies display robust attraction or repulsion behaviors to very specific object heights. We show that these apparently hard-wired visual preferences can be modified by experience and controlled or overwritten by optogenetic activation of dNPF neurons.

## MATERIALS AND METHODS

### Experimental animals

*Drosophila melanogaster* were reared using standard fly media and kept under a 12 h light–dark cycle at 25°C. Canton-S (CS) flies were used as wild-type (control) flies. For optogenetic control of the dNPF circuit, we made use of the Gal4/UAS system (Brand and Perrimon, 1993) to express red-shifted channelrhodopsin ‘Chrimson’, a non-selective ion channel, in dNPF neurons. Exposure to red light results in an activation of these ion channels and therefore an activation of the dNPF-expressing neurons. dNPF-Gal4 flies (kindly provided by Ulrike Heberlein, Janelia Research Campus, Ashburn, VA, USA) were crossed with UAS-CsChrimson::mVenus(attp40) flies (kindly provided by Vivek Jarayaman, Janelia Research Campus) to provide female transgenic flies used in this study. For optogenetic activation of the dNPF-neurons, Gal4;UAS-CsChrimson::mVenus flies were fed with blue-dyed 0.2 mmol l<sup>-1</sup> all-*trans*-retinal (ATR, Sigma-Aldrich, St Louis, MO, USA) food for 2 days before the experiments and kept in darkness until testing (Klapoetke et al., 2014). Non-retinal-fed animals were used as controls.

We used female flies at 3–11 days or 17–40 days post-eclosion. Each fly was immobilized under cold anesthesia (0.5°C) for 60 s and positioned for tethering on a custom-made preparation block. The flies were then glued dorsally to a tungsten rod by means of dental cement (Coltene Whaledent Synergy D6 Flow A3.5/B3) (Fig. 1A), cured with blue light (Radii Plus, Henry Schein Dental). In order to avoid wing movements and to encourage walking of the fly, the fly’s wings were tethered to the tungsten rod by folding them against the rod and using dental cement for fixation. Additionally, to stabilize the head, it was fixed by applying dental cement to the neck of the fly (Paulk et al., 2015). After tethering, the animals were provided with water and allowed to rest for about 60 min before testing began.

### Experimental setup

The virtual reality arena was set up as described in Van De Poll et al. (2015). The hexagon-shaped arena consisted of six 32×32 pixel LED panels (Schenzhen Sinorad Medical Electronics Inc.) (Fig. 1A). In its center, a visually patterned, air-supported Styrofoam ball (40 mg, 15 mm diameter; Spotlight Ltd Pty) was used as a walking medium for the tethered flies (Fig. 1B). For positioning of the flies on the ball, a 6-axis micromanipulator (Edmund Optics) was used. The setup was additionally illuminated by three 40 W bulbs in order to provide adequate lighting for tracking the fly and ball movements by a camera (Point Grey Laboratories) at 60 frames s<sup>-1</sup>, mounted at the front of the

arena. The video was further analyzed by FicTrac (Moore et al., 2014), custom-written tracking software operating in Ubuntu Linux (12.10) running on Windows 7 (SP1). To create a closed-loop environment where the fly could control the position of the stimulus, the movements of the stimuli were linked to the movements of the ball. This was achieved by linking the output (movement of the fly on the ball) of FicTrac with custom-written Python (2.5) scripts (modified after Van de Poll et al., 2015), which in turn generated the visual output with the corresponding stimulus position through VisionEgg software (Straw, 2008). FicTrac extracted the lateral movement ( $X$ ), the forward movement ( $Y$ ) and the rotation of the ball (turning  $\Delta\Theta$ ) (Fig. 1B) and calculated a fictive path of the fly movements which then resulted in a 1:1 translation between the movement of the ball and the rotation on the stimulus within the 360 deg arena (25 ms delay).

To induce Chrimson activation, three orange–red LED lights (Luxeon Rebel, 617 nm, 700 mA, LXM2-PH01-00700) were mounted around the arena, focusing on the center of the arena. The activation and inactivation of the red LED lights was linked to the position and size of the stimulus (Fig. 6), provided by FicTrac and controlled by a BlinkStick (Agile Innovative Ltd), and an LED controller board, driven by a custom-written Python (2.7) script. For these experiments, position thresholds triggered the activation and inactivation of the LEDs. In Fig. 6, for example, LED activation was induced via BlinkStick when the 26.25 deg bar was positioned by the fly in-between 330 and 30 deg (frontal visual field, FVF).

A lux meter (LX101BS) was used to determine luminosity of the background and the visual stimuli and the mean calculated from four independent measurements in Fig. 4. Colors of the arena were set in the custom-written Python (2.5) script as RGBA values. Colors of the visual stimuli were set as RGB values in the same script.

### Behavior

All behavioral experiments were performed in closed-loop. Flies were positioned on the air-supported ball in the LED arena (Fig. 1A) and allowed to habituate to the new environment for about 2–3 min.

### Single-bar fixation

In order to examine general fixation, the flies were exposed for three times 2 min in succession to a solid black (unlit) bar on a green (555 nm) background. The bar was 15 deg (8 pixels) wide and 60 deg (32 pixels) high (Fig. 1B) or 15 deg (8 pixels) wide and 26.25 deg (14 pixels) high (Fig. 2F). If a fly was fixating on the bar, it kept the stimulus within its FVF, which was defined as the width of the frontal panel (32 pixels, 60 deg) (Fig. 1B). Random perturbations were used in order to determine the quality of fixation. The bar was displaced every 10–30 s by 60 deg (32 pixels) to the left or to the right. The threshold for a successful repositioning was 10 s or less.

### Multiple-choice maze

For the multiple-choice maze, a set of 12 different visual stimuli was presented to the fly (Van De Poll et al., 2015). The stimuli were all solid black (or red) bars on a green (or red/cyan) background and 15 deg wide with different heights (Fig. 2A,B). The center of the bars was linked to the vertical center of the LED panels, so differences in bar height resulted in a symmetrical change. The flies were exposed to two competing stimuli, stimulus 1 and stimulus 2, always 180 deg apart, such that only one could be fixated upon at any point in time (Fig. 2C). A stimulus was regarded as successfully chosen when the fly walked a distance of 7 cm and mostly fixated that stimulus during that time (usually 20–50 s; for further details, see Van De Poll et al., 2015). The non-chosen stimulus was then

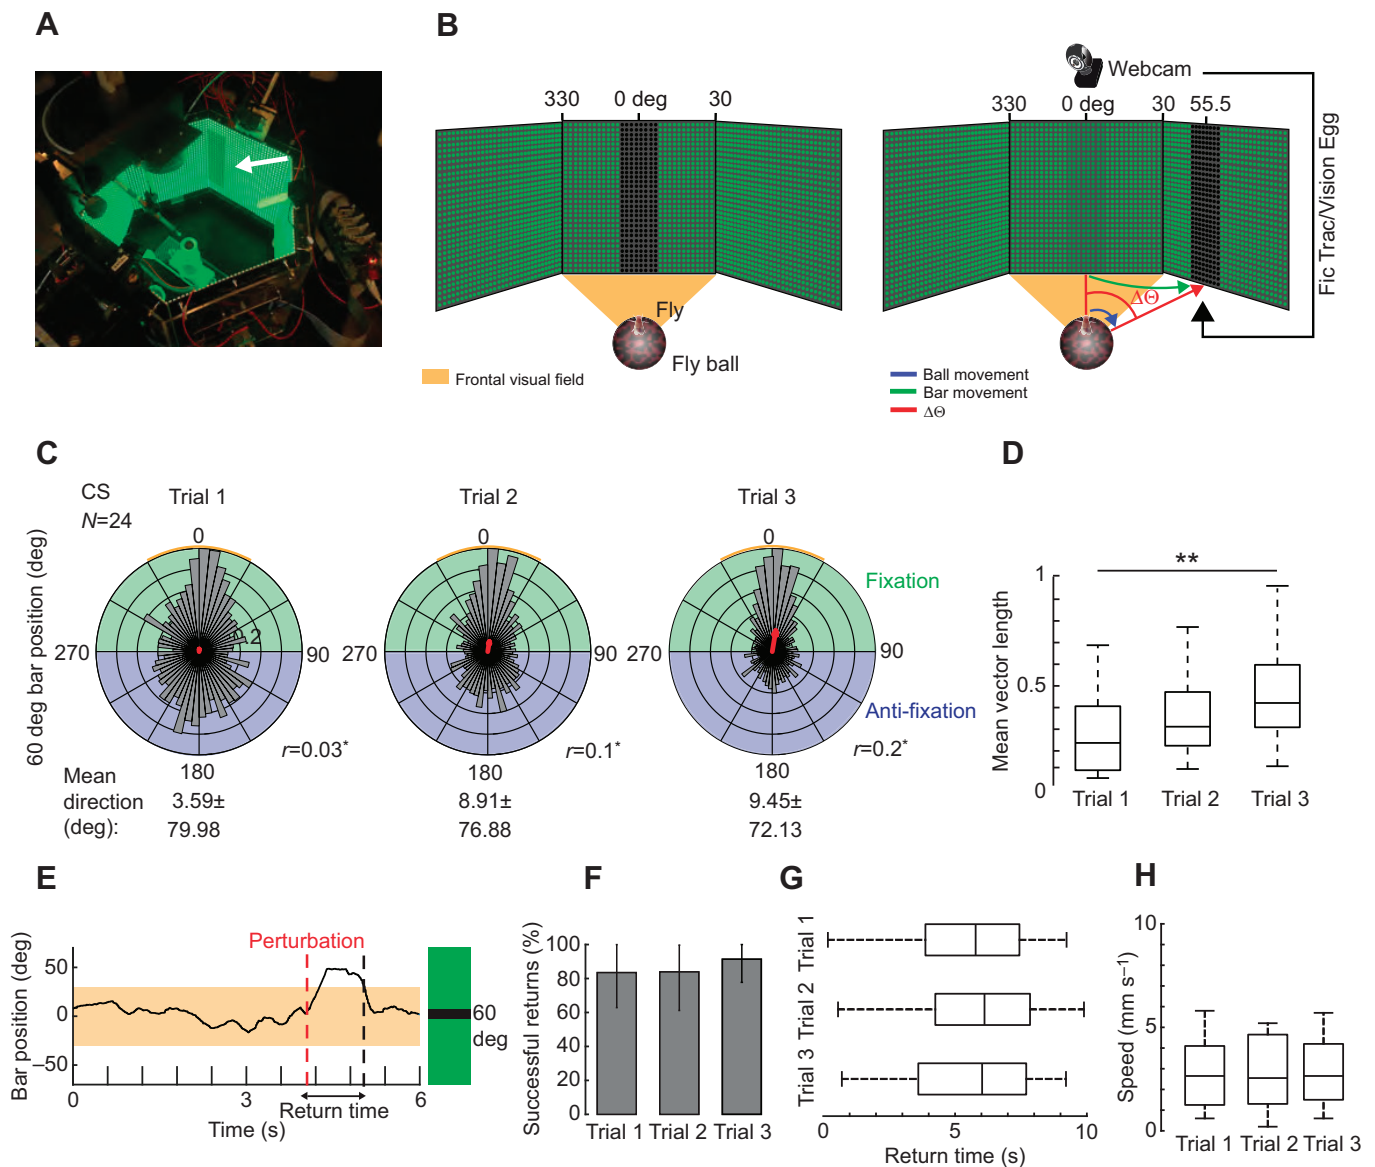

**Fig. 1. Flies fixate on a visual stimulus in a 360 deg LED arena.** (A) Virtual reality arena consisting of six LED panels arranged in a hexagonal design. A fly is positioned on an air-supported ball in the center of the LED arena. The white arrow represents the stimulus. (B) Frontal view of the arena. Left: the fly positioned on the ball is facing a visual stimulus (a black bar at 0 deg) in its frontal visual field (FVF, orange). Right: ball movements (blue arrow) produced by the walking fly are captured via a webcam and translated via a FicTrac/VisionEgg interface into movements of the stimulus displayed on the LED arena (green arrow). The fly moved the ball by a turning angle ( $\Delta\theta$ , red) of 55 deg; therefore, the stimulus moved from a position at 0 deg (faded bar) to a position at 55 deg (black bar). (C) Flies show increasing fixation towards a 60 deg bar ( $N=24$ , Rayleigh test,  $*P<0.05$ ); red arrow indicates the mean vector,  $r$  is the mean vector length. The orange region between 360 and 30 deg is the frontal visual field (FVF). (D) Mean vector length increases with increasing trial number ( $N=24$ , Kruskal–Wallis test,  $**P=0.009$ , Dunn’s multiple comparison test,  $\alpha=0.05$ ). (E) Example of a fly reacting to a stimulus perturbation. Black trace indicates bar position, orange shaded region is the FVF. (F) Successful returns after perturbations (error bars show s.d., ANOVA  $P=0.64$ , d.f.=2,  $F=0.4527$ , Brown–Forsythe test  $P=0.73$ ). (G) Time to return stimulus to the FVF after a perturbation (successful returns only) (Kruskal–Wallis test  $P=0.74$ , Kruskal–Wallis statistic: 0.6,  $n=3$  groups). (H) Average walking speed per trial (Kruskal–Wallis test  $P=0.86$ , Kruskal–Wallis statistic: 0.301,  $n=3$  groups).  $N$ , number of animals; CS, Canton S wild-type flies.

replaced by a new stimulus (Fig. 2B). Subsequently, the fly had to choose again between the previously fixated/chosen stimulus (continuation) and the new (novelty) stimulus. This allowed us to study choice behavior in a historical context. The experiment was ended after the flies were exposed to at least 80% of the possible choices, which resulted in experiments between 40 and 60 min typically, depending on the walking speed of the flies.

#### Pre-exposure experiment

For the pre-exposure experiments in Fig. 5, flies were presented with either a single 60 deg or a 26.25 deg high bar for three consecutive

2 min trials as described for the single-bar fixation experiments. Directly after these three consecutive trials, the flies were presented with the multiple-choice maze as described above. There was a 10 s break between all trials in which the flies walked in the arena without visual stimulation.

**Multiple-choice maze: optogenetic activation of the dNPF circuit in association with the 26.25 deg bar in the context of multiple visual choices**  
For the optogenetic experiment in Fig. 6, we used the same multiple-choice paradigm as described for Fig. 2. In order to activate the red LEDs, the fly had to position the 26.25 deg bar in the



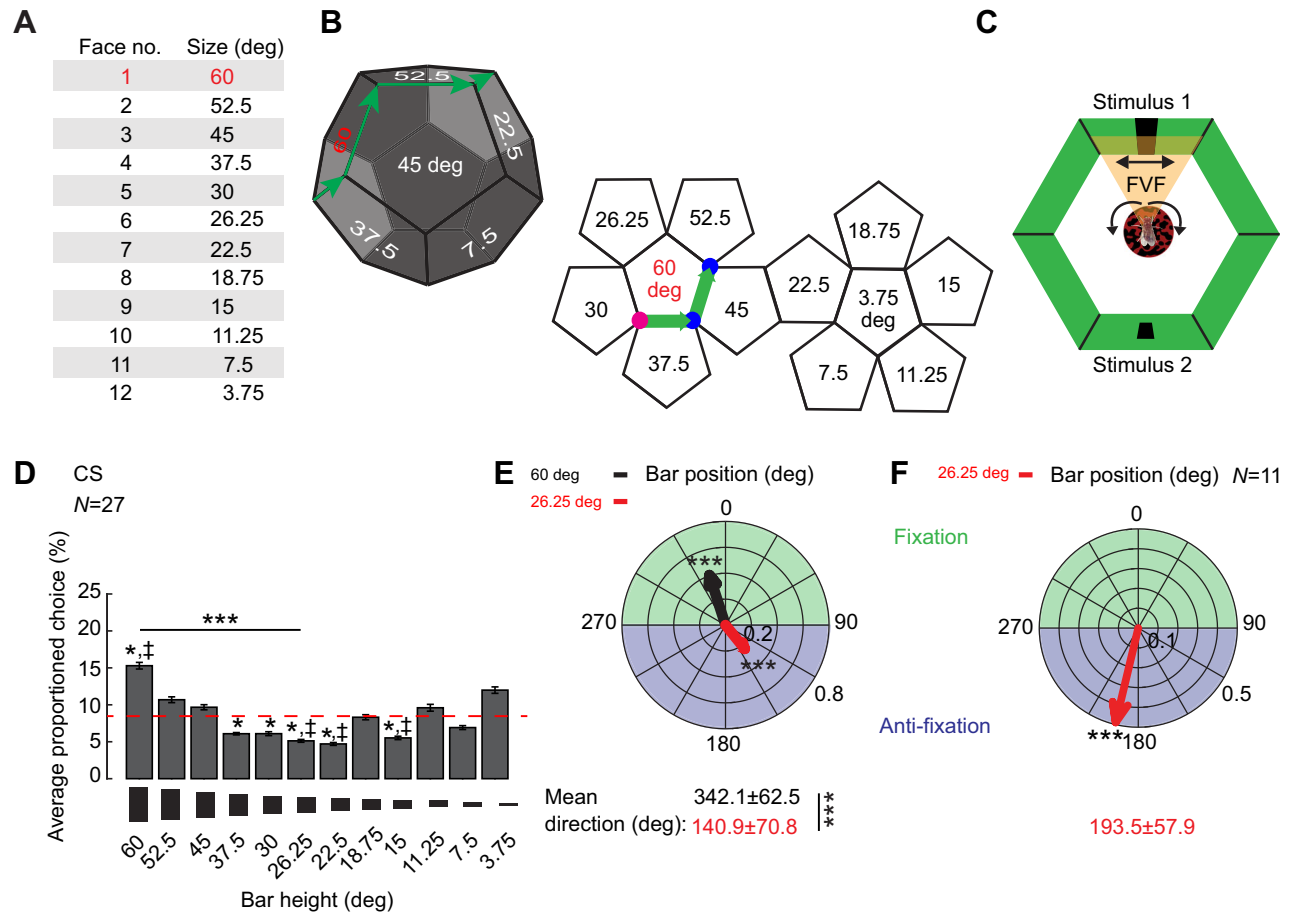

**Fig. 2. Flies show specific choice behavior towards different sized bars.** (A) Each face number in the multiple-choice design is assigned to a stimulus height. (B) Geometrical structure of the virtual maze. Left: every surface of the dodecahedral structure (face) represents one distinct stimulus. Green arrow: virtual path (see Materials and Methods). Faces on both sides of the path represent the displayed stimuli. Right: unwrapped virtual maze. Pink dot: starting point of experiment. The fly is first confronted with a 60 deg (red) and 37.5 deg stimulus. Blue dot: first decision point. The 37.5 deg bar is replaced by the 45 deg bar until the next decision is made. (C) In the arena, the visual stimuli are locked to be 180 deg apart. The movement of the stimuli is locked to the movement of the fly ball. (D) Average proportioned choice for all animals for all presented stimuli. (Kruskal–Wallis test  $P=0.003$ , Kruskal–Wallis statistic: 28.52,  $n=12$  groups, Dunn's multiple comparison test  $\alpha=0.05$ ). Asterisks above bars represent significant differences from chance level for each stimulus separately (red dashed line, 8.3% chance level, Wilcoxon rank-sum test  $\alpha=0.05$ ; \* $P<0.05$ , \*\*\* $P<0.001$ ); double daggers indicate the adjusted significance level ( $\ddagger P=0.0125$ , Benjamini–Hochberg method). Error bars show s.e.m. (E) Mean direction of bar positions of 60 deg (black arrow) and 26.25 deg (red arrow) bar within the LED arena (Rayleigh test for significance of mean direction  $\alpha=0.05$ , Watson–Williams test for difference between mean directions; \*\*\* $P<0.001$ ). (F) Mean direction of bar position of 26.25 deg bar within the LED arena (Rayleigh test  $\alpha=0.05$ ; \*\*\* $P<0.001$ ).  $N$ =number of animals.

FVF (330–30 deg). As soon as the 26.25 deg bar left this area, the LEDs were turned off via a BlinkStick (Agile Innovative Ltd). Analysis of the data was performed as before.

Binary-choice paradigm: optogenetic activation of the dNPF circuit in association with the 26.25 deg bar in the context of one choice  
For the learning experiments in Fig. 7, flies were presented with two competing solid black bars (60 deg and 26.25 deg) on a green background. At any time, the bars were 180 deg apart, and flies could fixate on one or the other. Random perturbations ensured active fixation. The experiment was divided into three parts: baseline, training, memory. In the baseline trials, the flies had to choose between the two bars for 2 min in three consecutive trials. In the training trials (3×2 min), red LEDs were activated every time the 26.25 deg bar was in the FVF using a BlinkStick controller board (Agile Innovative Ltd). In the last three trials (2 min each), memory was tested without the activation of the red LEDs.

Single-bar fixation: optogenetic activation of the dNPF circuit in association with the position of the 60 deg bar

For the single-bar fixation experiments in Fig. 8, red LEDs were activated when the dark solid bar was at different positions in the arena (right: 60–120 deg; back: 150–210 deg; left: 240–300 deg). As in the last two experiments, LED activation was controlled by a BlinkStick (Agile Innovative Ltd). Each position was tested for three consecutive 2 min trials. Fixation was averaged across these three trials (no significant difference was found between trials, Watson–Williams-test,  $\alpha=0.05$ , data not shown). Each time, after one side was tested for fixation, we returned to a 2 min trial of single-bar fixation without optogenetic activation in order to test whether there was a significant learning effect. To test for learning, we extracted 20 s from this trial and analyzed the mean direction of the bar position after dNPF circuit stimulation. We did not observe any significant learning effect for all directions compared with baseline trials (fixation without LEDs activation) (Watson–Williams-test,  $\alpha=0.05$ , data not shown), so we averaged the first

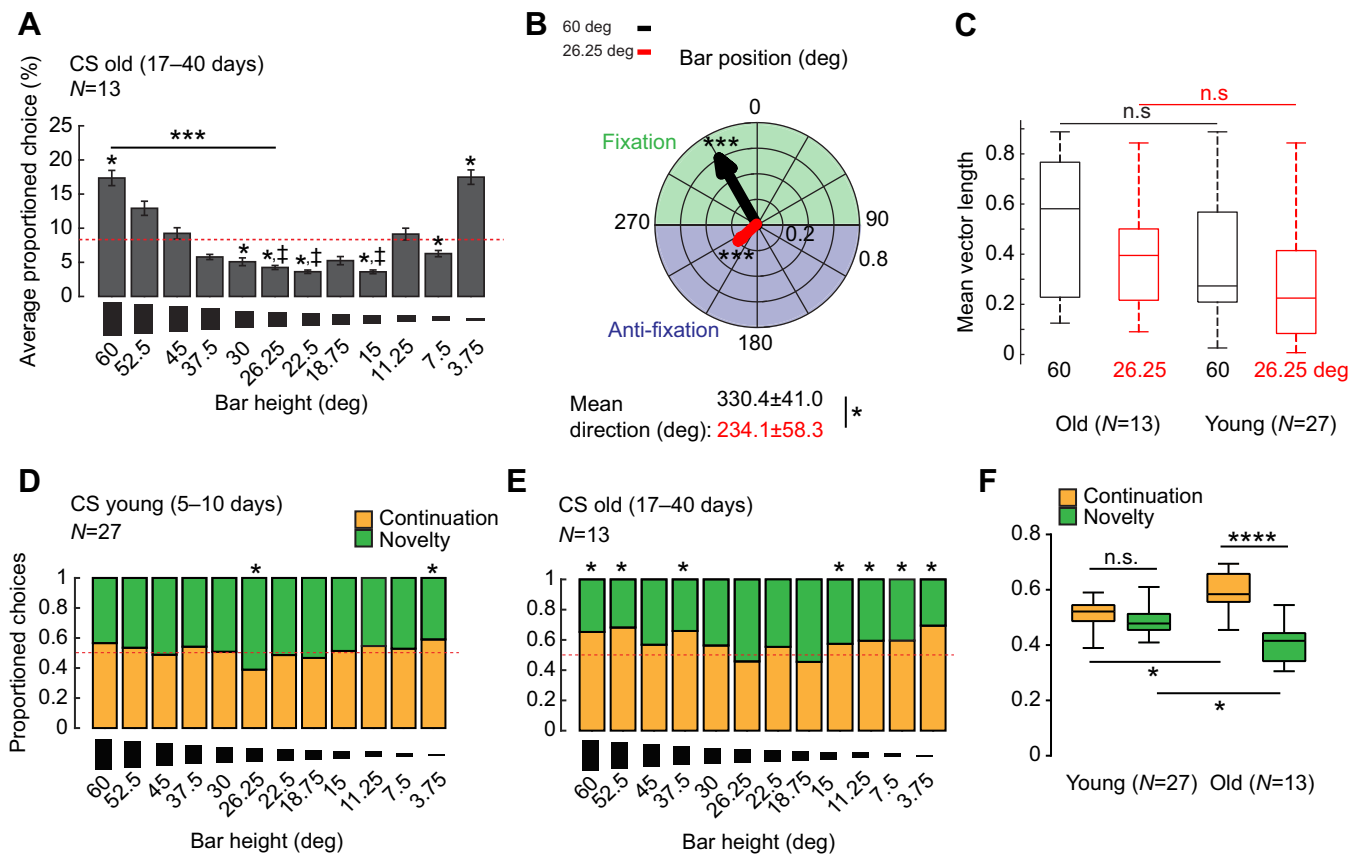

**Fig. 3. Effect of age on fly choice behavior.** (A) Choice profile of 17–40 days post-eclosion female CS flies (Kruskal–Wallis test  $P=0.008$ , Kruskal–Wallis statistic: 25.56,  $n=12$  groups, Dunn’s multiple comparison test  $\alpha=0.05$ ). Red dashed line indicates the 8.3% chance level (Wilcoxon rank-sum test  $\alpha=0.05$ ;  $*P<0.05$ ,  $***P<0.001$ ; adjusted significance level  $*P=0.008$ , Benjamini–Hochberg method, compared with chance level for each stimulus separately). (B) Mean direction of bar positions for the 60 deg (black arrow, mean vector) and 26.25 deg (red arrow, mean vector) bars (Rayleigh test for mean vector length  $\alpha=0.05$ , Wilcoxon rank-sum test for comparison of mean direction  $\alpha=0.05$ ;  $*P<0.05$ ;  $***P<0.001$ ). (C) Mean vector length for the 26.25 deg bar and the 60 deg bar for 17–40 day old flies and young (5–10 day old) flies (Wilcoxon rank-sum test,  $\alpha=0.05$ ). (D) Proportioned novelty and continuation choices for visual stimuli of 17–40 day old flies. Red dashed line indicates the 50% chance level (Wilcoxon rank-sum test between continuation and novelty  $\alpha=0.05$ ;  $*P<0.05$ ). (E) Proportioned novelty and continuation choices for visual stimuli of young (5–10 day old) flies. Red dashed line indicates 50% chance level (Wilcoxon rank-sum test between continuation and novelty,  $\alpha=0.05$ ;  $*P<0.05$ ). (F) Pooled novelty and continuation behavior for old and young flies (ANOVA  $P<0.0001$ , d.f.=3,  $F=14.3$ , Brown–Forsythe test  $P=0.4$ , Tukey’s multiple comparison test  $\alpha=0.05$ ;  $*P<0.05$ ,  $****P<0.0001$ ).  $N$ =number of animals. Error bars show s.e.m. n.s., not significant.

trial without dNPF circuit activation for all experiments (1st trial LED off).

### Immunohistochemistry and imaging

dNPF-Gal4,UAS-mCD8::GFP flies were collected under  $\text{CO}_2$  anesthesia and dissected under cold  $1\times$  phosphate-buffered saline (PBS). Samples were then fixed with 4% paraformaldehyde diluted in PBS-T ( $1\times$  PBS,  $0.2\times$  Triton-X 100) for 20 min, followed by  $3\times 20$  min washes in PBS-T. They were then blocked with 10% goat serum (Sigma-Aldrich) for 1 h and incubated in primary antibody overnight. We used mouse antibody to nc82 [1:100, Developmental Studies Hybridoma Bank (DSHB)] and rabbit antibody to GFP (1:1000, Invitrogen). After  $3\times 20$  min washes with PBS-T, secondary antibody was added and the tube was covered with aluminium foil for overnight incubation. We used AlexaFluor-488 goat anti-rabbit (1:250, Invitrogen) and AlexaFluor-647 goat anti-mouse (1:250, Invitrogen) as secondary antibodies. Following three final washes with PBS-T, samples were transferred to microscope slides and mounted on a drop of Vectashield (Vector Laboratories) for imaging.

Imaging was done using a spinning-disk confocal system (Marianas; 3I, Inc.) consisting of an Axio Observer Z1 (Carl Zeiss) equipped with a CSU-W1 spinning-disk head (Yokogawa Corporation

of America), and an ORCA-Flash4.0 v2 sCMOS camera (Hamamatsu Photonics); a  $20\times 0.8$  NA PlanApo objective was used and image acquisition was performed using SlideBook 6.0 (3I, Inc.).

### Statistics

FicTrac datasets were imported for offline analysis in MATLAB 2015b as well as in GraphPad Prism 7.0. In order to analyze fixation, bar positions were converted into polar coordinates and their mean vector length calculated using the Circular Statistics Toolbox for MATLAB (Berens, 2009). All data were first tested for normal distribution using the D’Agostino and Pearson test for normality, set at  $\alpha=0.05$ . A Brown–Forsythe test was used to test for differences in standard deviations. Groups of parametric data were tested for significant differences using an ordinary one-way ANOVA followed by a Bonferroni multiple comparisons test, set at  $\alpha=0.05$ , or a Tukey’s multiple comparisons test ( $\alpha=0.05$ ) to detect specific differences. Groups of non-parametric data were tested for significant differences using a Kruskal–Wallis test followed by a Dunn’s multiple comparisons test ( $\alpha=0.05$ , corrected). Pairwise data were compared using a  $t$ -test (parametric) or Wilcoxon rank-sum test (non-parametric). In some instances, averaged proportioned choices for particular stimuli were compared independently with a chance value of 8.333% using the

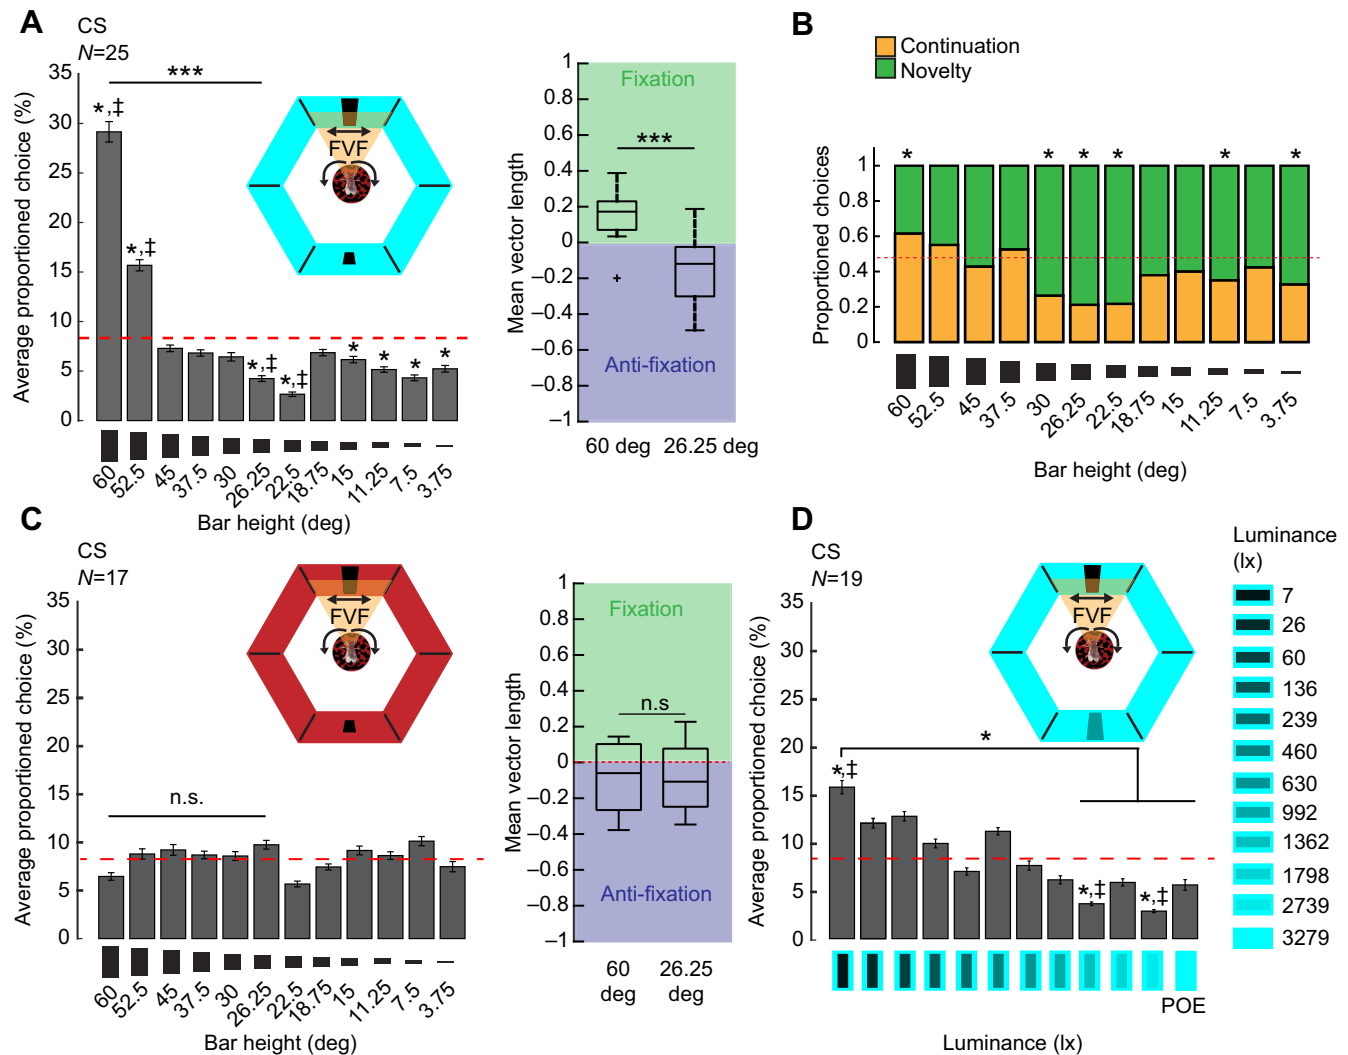

**Fig. 4. Characteristic choice behavior for different sized visual stimuli stays robust under different light/color conditions.** (A) Left: averaged proportioned choice for 12 different visual stimuli on cyan background (Kruskal–Wallis test  $P < 0.0001$ , Kruskal–Wallis statistic: 51.87,  $n = 12$  groups, Dunn’s multiple comparisons test  $\alpha = 0.05$ ). Right: mean vector length of pooled 60 deg bar and 26.25 deg bar positions within the LED arena (red dashed line, 8.3% chance level, Wilcoxon rank-sum test  $\alpha = 0.05$ ;  $*P < 0.05$ ,  $***P < 0.001$ ; adjusted significance  $^{\dagger}P = 0.0125$ , Benjamini–Hochberg method). (B) Novelty and continuation choice profile for choice paradigm with cyan background. Red dashed line indicates 50% chance level (Wilcoxon rank-sum test  $\alpha = 0.05$  compared between novelty and continuation;  $*P < 0.05$ ). (C) Average proportioned choice for black visual stimuli on red background (red dashed line, 8.3% chance level, Wilcoxon rank-sum test  $\alpha = 0.05$ ; Kruskal–Wallis test  $P = 0.54$ , Kruskal–Wallis statistic: 9.88,  $n = 12$  groups, Dunn’s multiple comparisons test  $\alpha = 0.05$ ). Right: mean vector length of pooled 60 deg and 26.25 deg bar positions within the LED arena (Wilcoxon rank-sum test  $\alpha = 0.05$ ). (D) Averaged proportioned choice for 60 deg bar stimuli with different contrasts compared with background (see Materials and Methods) (red dashed line, 8.3% chance level, Wilcoxon rank-sum test  $\alpha = 0.05$ ; Kruskal–Wallis test  $P < 0.0001$ , Kruskal–Wallis statistic: 58.56,  $n = 12$  groups, Dunn’s multiple comparisons test  $\alpha = 0.05$ ;  $*P < 0.05$ ; adjusted significance level  $^{\dagger}P = 0.016$ , Benjamini–Hochberg method). POE, point of equal luminosity to background; key on the right shows luminosities of the bar.  $N$  = number of animals. n.s., not significant.

Wilcoxon rank-sum test  $\alpha = 0.05$  and further corrected with the Benjamini–Hochberg method using the `fdr_bh()` function in Matlab. Significance for the uncorrected values for this analysis is denoted with an asterisk and the corrected values with a double dagger in the figures; the new corrected significance level is listed in the figure legends. For circular data, the distribution of the bar positions and the mean vector length was tested for non-uniformity using the Rayleigh test. The mean direction of the mean vectors was compared using the Watson–Williams test (Berens, 2009; Watson and Williams, 1956).

## RESULTS

### Visual fixation in a closed-loop virtual reality environment for walking flies

A female *D. melanogaster* fly was positioned on an air-supported ball in the center of a hexagonal LED arena (Fig. 1A,B). The fly was

presented with a visual stimulus (a dark bar on a lit green background, 15 deg wide and 60 deg high). Walking of the fly resulted in forward, lateral and turning movements of the ball. These movements were translated into corresponding movements of the visual stimulus displayed by the LED arena via a camera-based closed-loop interface (FicTrac; Moore et al., 2014; Fig. 1B). For example, if a fly was moving the ball laterally to the left side by 55 deg, which indicates a turning behavior to the left, the visual stimulus moved to the left by 55 deg as well. The resulting rotation angle ( $\Delta\theta$ ) is the difference between two stimulus positions in the arena, measured from the center of the air-supported ball (Fig. 1B). This setup allowed the fly to keep the visual stimulus in the FVF voluntarily, so we could assess fixation and attention-like parameters. Flies rapidly learned to fixate on the virtual object and increased their fixation significantly over three consecutive 2 min trials (Fig. 1C,D). To ensure that flies actively

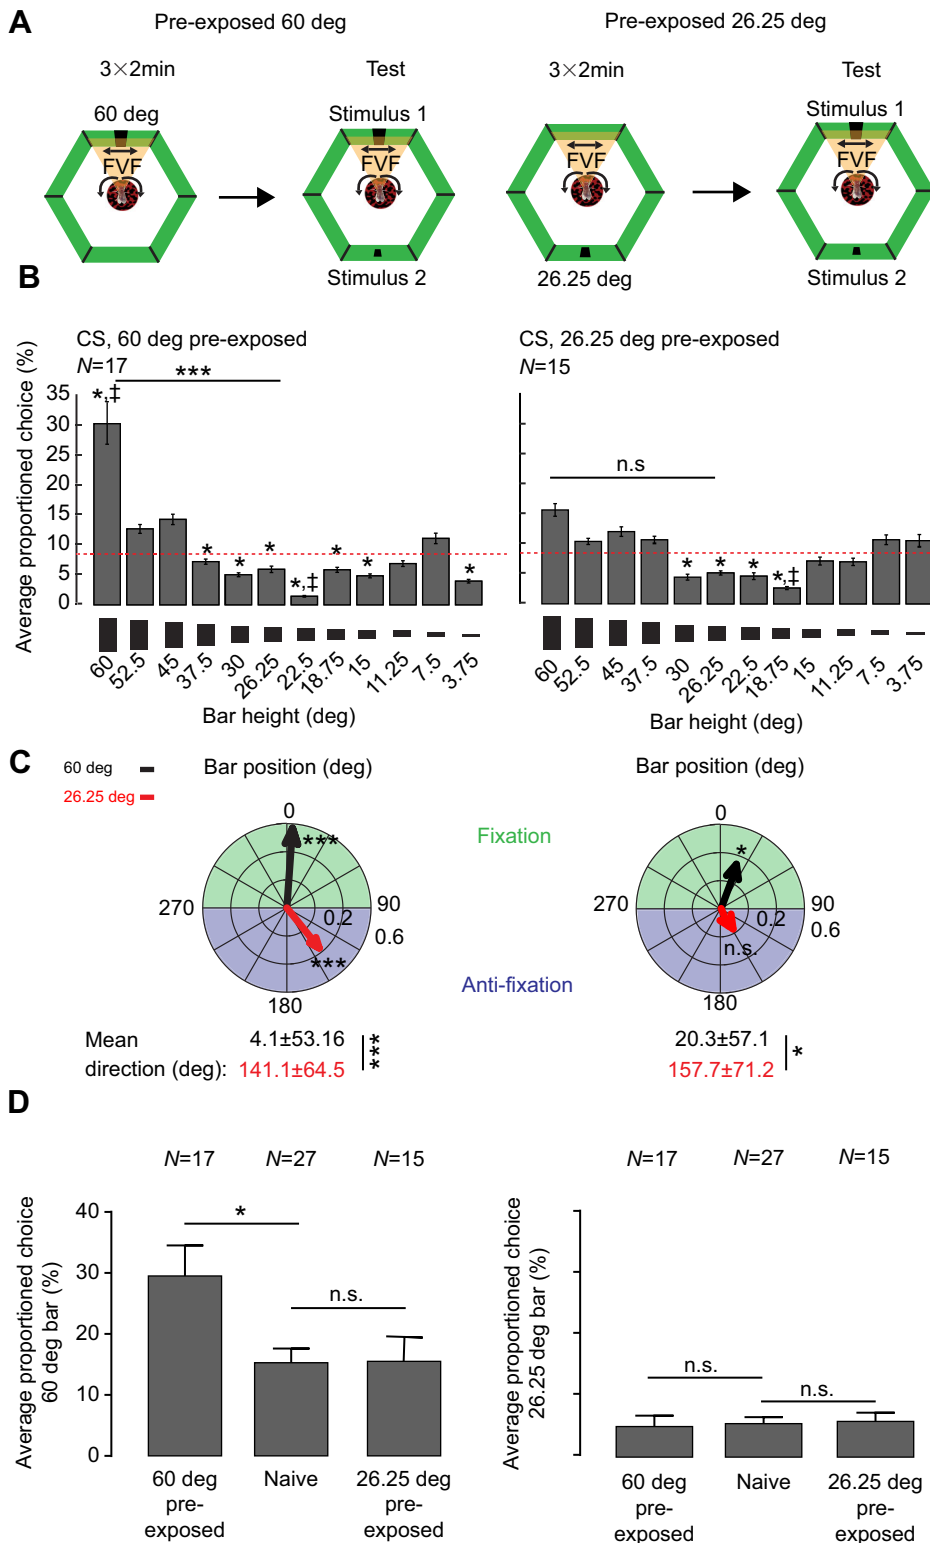

**Fig. 5. Prior exposure to an attractive or repulsive visual stimulus has different effects on subsequent choice behavior.**

(A) Experimental setup. Animals were exposed to a single visual stimulus for 2 min in three consecutive trials (left: attractive 60 deg, right: repulsive 26.25 deg). After this pre-exposure, flies were exposed to stimuli in the choice maze, as in Fig. 2. (B) Left: averaged proportioned choice profile for visual stimuli after pre-exposure to the 60 deg bar (Kruskal–Wallis test  $P < 0.0001$ , Kruskal–Wallis statistic: 43.66,  $n = 12$  groups, Dunn's multiple comparisons test  $\alpha = 0.05$ ). Right: averaged proportioned choice profile for visual stimuli after pre-exposure to the 26.25 deg bar (Kruskal–Wallis test  $P = 0.0084$ , Kruskal–Wallis statistic: 25.24,  $n = 12$  groups, Dunn's multiple comparisons test  $\alpha = 0.05$ ). Significant differences from chance level for each stimulus separately are indicated (red dashed line, 8.3%, Wilcoxon rank-sum test  $\alpha = 0.05$ ; \* $P < 0.05$ , \*\*\* $P < 0.001$ ; adjusted significance level † $P = 0.008$  for 60 deg pre-exposure, ‡ $P = 0.0125$  for 26.25 deg pre-exposure, Benjamini–Hochberg method). (C) Left: mean direction and mean vector lengths of 60 deg (black bar) and 26.25 deg (red bar) after pre-exposure to 60 deg bar. Right: mean direction and mean vector lengths of 60 deg (black bar) and 26.25 deg (red bar) after pre-exposure to 26.25 deg bar (Rayleigh test for mean vector length  $\alpha = 0.05$ , and Watson–Williams test for mean direction  $\alpha = 0.05$ ; \* $P < 0.05$ , \*\*\* $P < 0.001$ ). (D) Left: pre-exposure to the attractive 60 deg bar results in an increase in averaged proportioned choice for the 60 deg bar compared with naive flies (ANOVA \* $P = 0.025$ ,  $F = 3.96$ , d.f.=2, Brown–Forsythe test, n.s.  $P = 0.12$ , Bonferroni multi-comparison test compared with naive dataset  $\alpha = 0.05$ ). Right: pre-exposure to the aversive 26.25 deg bar results in no significant changes in choice behavior for the 26.25 deg bar compared with naive flies (ANOVA, n.s.  $P = 0.95$ ,  $F = 0.54$ , d.f.=2, Brown–Forsythe test n.s.  $P = 0.84$ ).  $N =$  number of animals. Error bars indicate s.e.m.

fixated on the object, we introduced visual perturbations, where the stimulus was randomly moved by 60 deg to the left or to the right every 10–30 s. If the flies were actively attending to the stimulus, they rapidly returned it to their FVF within 10 s (Fig. 1E; see Materials and Methods). We found no significant difference in the proportion of successful returns after the perturbations (mean±s.d.: trial 1: 83.5±20.6, trial 2: 79.9±28.7, trial 3: 86.8±24.4) or the time taken to return the stimulus to the FVF (median: trial 1; 5.8 s, trial 2: 6.1 s, trial 3:

6.0 s) between the three trials (Fig. 1F,G). Further, there was no significant difference in walking speed during the three trials (median: trial 1: 2.7 mm s<sup>-1</sup>, trial 2: 2.6 mm s<sup>-1</sup>, trial 3: 2.7 mm s<sup>-1</sup>) (Fig. 1H).

### Flies navigate through a virtual maze to reveal visual preferences and aversions

We next investigated visual decision making in this paradigm. Not all visual stimuli are intrinsically attractive for *Drosophila* (Maimon et al.,

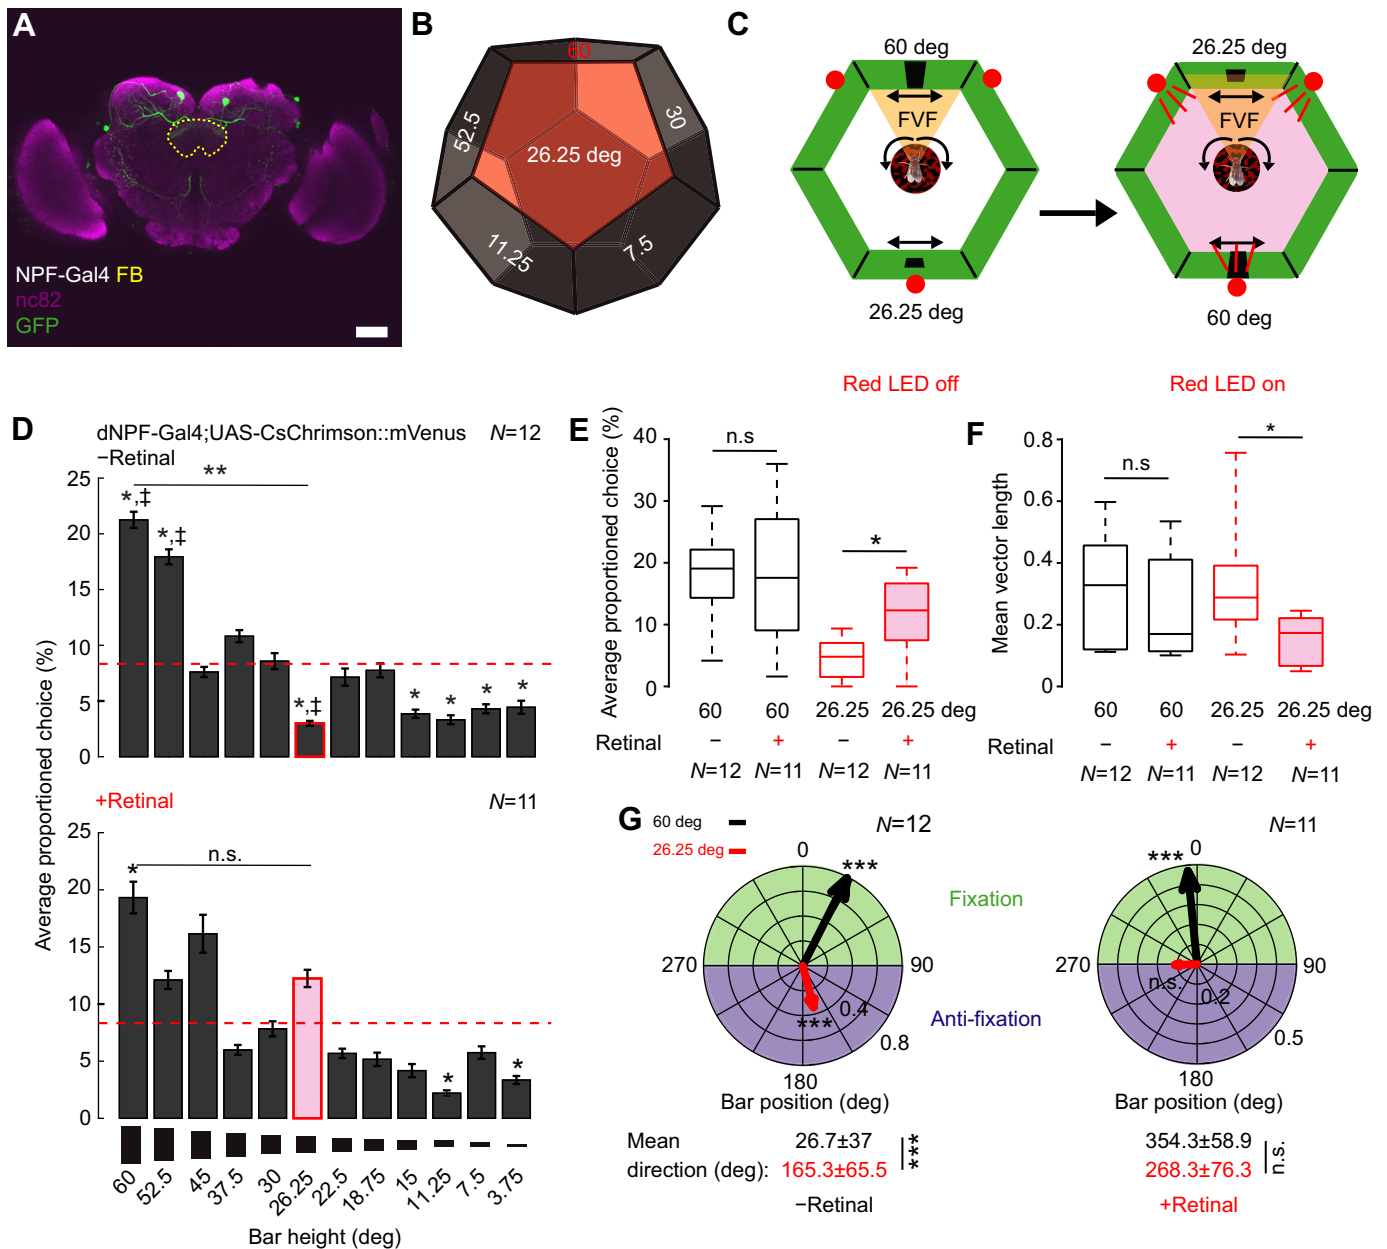

**Fig. 6. Optogenetic activation of *Drosophila* neuropeptide F (dNPF) circuit alters choice behavior for a repulsive visual stimulus.** (A) dNPF circuit (green/GFP). A subset of dNPF neurons have projections to the fan-shaped body (yellow dashed line). Scale bar: 50  $\mu$ m. (B) During the choice maze experiment, only the presence of the repulsive 26.25 deg stimulus (red hexagonal surface) triggered optogenetic dNPF circuit activation by red LED lights. (C) The 26.25 deg stimulus had to enter the FVF in order to trigger red LED activation ('Red LED on'). (D) Average proportioned choice profile of the control flies (non-retinal fed, -Retinal) (Kruskal-Wallis test  $P < 0.0001$ , Kruskal-Wallis statistic: 51.83,  $n = 12$  groups, Dunn's multiple comparisons test  $\alpha = 0.05$ ) and the dNPF circuit activated flies (retinal fed, +Retinal) (red dashed line, 8.3% chance level, Wilcoxon rank-sum test  $\alpha = 0.05$  to compare every proportioned choice separately with chance level; Kruskal-Wallis test  $P = 0.0002$ , Kruskal-Wallis statistic: 35.74,  $n = 12$  groups, Dunn's multiple comparisons test  $\alpha = 0.05$ ;  $*P < 0.05$ ,  $**P < 0.01$ ; adjusted significance level  $\ddagger P = 0.0125$  for -Retinal, n.s. for +Retinal, Benjamini-Hochberg method). (E) Average proportioned choice of the 26.25 deg and the 60 deg bar with (red) and without (black) LED activation for both groups (+Retinal, -Retinal) (Wilcoxon rank-sum test  $\alpha = 0.05$ ;  $*P < 0.05$ ). (F) Mean vector length, representing the distribution of the 60 deg and 26.25 deg bar positions in the LED arena with (red) and without (black) LED activation for both groups (+Retinal, -Retinal) (Wilcoxon rank-sum test  $\alpha = 0.05$ ;  $*P < 0.05$ ). (G) Left: mean direction and vector length of the 60 deg (black) and 26.25 deg (red) bar positions within the LED arena, control group. Right: mean direction and vector length of the 60 deg (black) and 26.25 deg (red) bar positions within the LED arena during LED activation for the 26.25 deg bar, retinal-fed group (Rayleigh test for mean vector length  $\alpha = 0.05$ , Watson-Williams test for mean direction  $\alpha = 0.05$ ;  $***P < 0.001$ ).  $N =$  number of animals. Error bars indicate s.e.m. n.s., not significant.

2008; Park and Wasserman, 2018). In order to better understand visual preferences in flies, we implemented a virtual choice maze used previously to study visual preferences in honeybees (Van De Poll et al., 2015). In this previous experiment, bees were able to choose recurrently between 12 visual stimuli, which were green bars

flickering at different frequencies. This operant approach revealed a clear preference/aversion profile for specific visual flickers in bees. We implemented a similar recursive approach for *Drosophila*, to determine visual preferences or aversions among 12 different sized bars, presented in paired competition with one another. The bars were



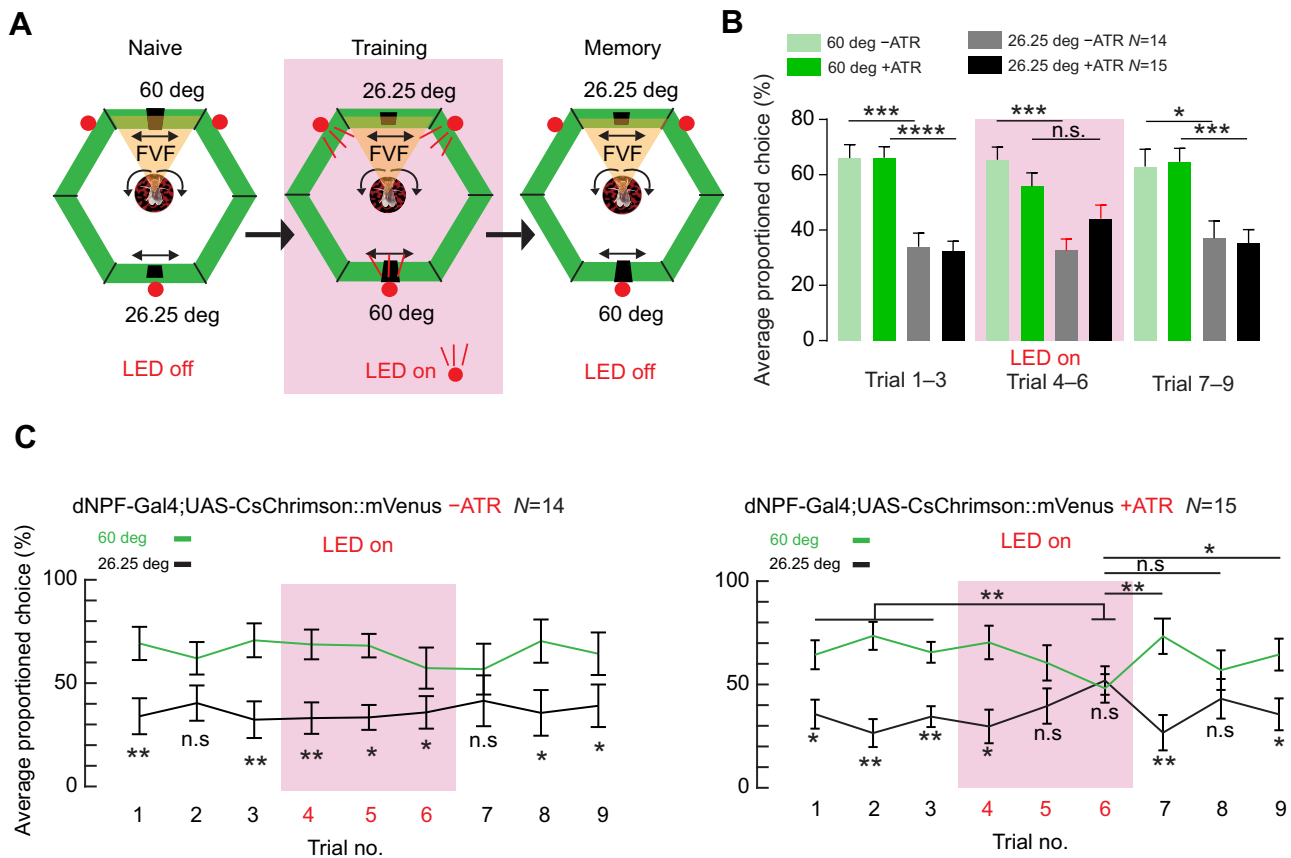

**Fig. 7. Activation of dNPF circuit transiently reduces negative valence.** (A) From left to right: naive: retinal-fed flies were tested for their baseline fixation and anti-fixation behavior towards the competing large 60 deg bar and the smaller 26.25 deg bar for 2 min in three consecutive closed-loop trials. Training: three consecutive 2 min trials, wherein positioning of the 26.25 deg bar in the FVF caused activation of red LEDs. Memory: three consecutive 2 min trials, without LED activation. (B) Average proportioned choices between the 60 deg bar and the 26.25 deg bar summarized for trials 1–3, trials 4–6 and trials 7–9 (ANOVA  $P < 0.0001$ ,  $F = 10.44$ , d.f.  $n = 5$ , Brown–Forsythe test  $P = 0.47$ , Bonferroni’s multiple comparisons test  $\alpha = 0.05$ ; \* $P < 0.05$ , \*\*\* $P < 0.001$ , \*\*\*\* $P < 0.0001$ ). (C) Average proportioned choices for 60 deg (green) bar and 26.25 deg (black) bar for all trials. Red area indicates training phase with LED activation when 26.25 deg bar was in the FVF. Left: control -ATR. Right: +ATR (Wilcoxon rank-sum test between average proportioned choices for the 60 deg bar and the 26.25 deg bar  $\alpha = 0.05$ , between trials: Kruskal–Wallis test  $P = 0.99$  for control and  $P = 0.3$  for +ATR; Dunn’s multiple comparisons test  $\alpha = 0.05$ ; \* $P < 0.05$ , \*\* $P < 0.01$ ).  $N =$  number of animals. n.s., not significant. Error bars indicate s.e.m.

all dark on a lit green background, 15 deg wide and between 3.75 and 60 deg high (Fig. 2A). The flies walked on a fictive path along the edges of a (virtual) dodecahedral structure (Fig. 2B, green arrows). This fictive path represents the whole distance and duration the fly moves while being presented with two competing stimuli. The faces of the geometric structure represented the different visual objects (Fig. 2A,B; bar height in degrees). At any time, the fly was thus presented with two competing objects (faces in Fig. 2B), 180 deg apart (Fig. 2C). Flies fixated on one or the other object, and after walking for 7 cm (fictive path), a decision was arrived at by the program algorithm (see Materials and Methods) depending on which object was most fixated upon. Perturbations occurred throughout, as above (Fig. 1E), to ensure this was an active choice. The more fixated object was retained and the less fixated object was replaced by another object, represented as the next adjacent face on the dodecahedron structure (Fig. 2B). An experiment lasted until at least 80% of all stimuli were seen, or a minimum of 45 min per fly, yielding an average proportioned choice profile (Fig. 2D, see Materials and Methods).

Our closed-loop visual competition experiments revealed that wild-type, female *Drosophila* selected the large 60 deg bar above chance level (red dashed line at 8.3%, Fig. 2D). Interestingly, flies seemed to select medium-sized bars (37.5–22.5 deg) significantly below chance level, suggesting these are visually repulsive to them.

Calculating the mean direction vector for the stimuli revealed that the 60 deg bar was indeed mostly positioned in the FVF ( $342.1 \pm 62.5$  deg). In contrast, medium-sized bars were positioned behind the fly: for example, the 26.25 deg bar was positioned in the opposite direction ( $140.9 \pm 70.8$  deg) on average (Fig. 2E). The mean directions for the largest (60 deg) bar and the medium (26.25 deg) bar were significantly different from each other (Fig. 2E), and the 60 deg bar was chosen significantly more often than the 26.25 deg bar (Fig. 2D). Having found that the 26.25 deg bar was consistently avoided when presented in competition with other bars, we then asked whether it was aversive even when presented on its own. Indeed, when we presented the 26.25 deg bar on its own (as in Fig. 1 for the 60 deg bar), flies displayed clear anti-fixation behavior (Fig. 2F). This confirms that the 26.25 and 60 deg bars are indeed visually ‘repulsive’ and ‘attractive’, respectively, and that our operant virtual maze design can effectively uncover these innate visual preferences.

We next investigated whether these innate visual preferences persisted through life in older female flies. Older flies (17–40 day) displayed a remarkably similar choice profile to that of the younger (5–10 day) flies (Fig. 3A), again choosing the 60 deg bar significantly more often than the 26.25 deg bar. Interestingly, the smallest bar (3.75 deg) became attractive to older flies, to a similar level to the

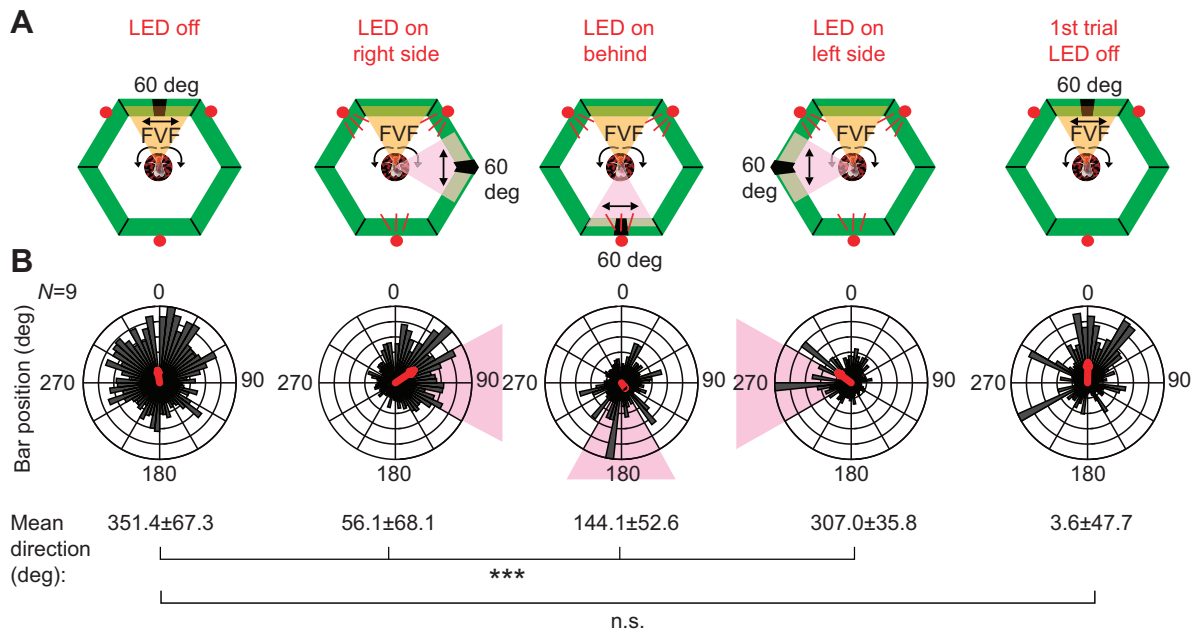

**Fig. 8. Acute activation of the dNPF circuit is a positive cue.** (A) Experimental setup. Red LEDs were activated when the bar was on the left, back or right side (red shaded area). Orange area indicates the FVF. (B) Mean directions and mean vectors (red arrows) of bar positions during the experiment. Each polar plot is the average of three consecutive 2 min trials for all animals. LED off is the average of three 2 min trials for all animals. Red area indicates where the bar needed to be to trigger the activation of the red LEDs. Darker histograms in polar plots represent binned bar distributions. 1st trial LED off represents the first 20 s after the optogenetic activation.  $N$ =number of animals; \*\*\* $P$ <0.001; n.s., not significant; Watson–Williams test compared with baseline trial 1  $\alpha$ =0.05.

largest bar. Older flies showed a significant fixation for the 60 deg bar and an anti-fixation for the 26.25 deg bar, with a significant difference in mean vector direction between these objects (Fig. 3B). However, there was no significant difference in mean vector length between the young and old dataset for these two visual objects (Fig. 3C). This indicates that the quality of fixation (and anti-fixation) remains robust with age. Interestingly, old age significantly decreased novelty-seeking behavior in this paradigm (Fig. 3D,E). Every visual choice represents two different historical contingencies: either a continued selection of a preferred object (a ‘continuation’ choice) or a selection of a novel object that has just replaced a previously non-preferred object (a ‘novelty’ choice) (Van De Poll et al., 2015; see Materials and Methods). Younger flies fixated upon the smaller 26.25 deg bar more often when it was novel (Fig. 3D), suggesting that novelty could override repulsion. In contrast, older flies mostly displayed continuation choices (Fig. 3E), and showed significantly less novelty-seeking behavior in general for all objects (Fig. 3F). These experiments show that innate visual preferences remain robust throughout a fly’s life, without deterioration in fixation behavior, although more flexibility in younger flies is evident.

#### Repulsion and attraction for different sized objects remain similar with different colored backgrounds

A recent study investigating visual attention in *Drosophila* showed that background luminosity and color affect visual attraction and aversion behavior in flies (Koenig et al., 2016). To test whether this might be the case for the visual objects in our closed-loop paradigm, we ran our virtual maze experiments with different background colors, and we also explored how contrast might affect choice behavior for an attractive stimulus (Fig. 4). Changing the background color from green (RGBA: 0.0, 1.0, 0.0, 1.0) to cyan (RGBA: 0.0, 0.58, 0.58, 1.0) and maintaining the same luminosity (3279 lx) did not alter the choice profile of young wild-type female flies, although more significant effects were noted (Fig. 4A). The

60 deg bar was still chosen significantly more often than the 26.25 deg bar, and the mean direction of each bar position for these objects was still significantly different (Fig. 4A, right box plot). Behavioral processes were also preserved under these different conditions: the 60 deg bar was mostly chosen as a ‘continuation’ event, whereas the 26.25 deg bar was fixated upon mostly if it was novel (Fig. 4B). When we presented competing dark objects on a red background (RGBA: 0.2, 0.0, 0.0, 1.0), the choice profile became flat (Fig. 4C), showing no significant preferences for any object. *Drosophila* have little perception of red-shifted light because they lack the corresponding photoreceptors (Garbers and Wachtler, 2016), so it is not surprising that they could not perceive the dark objects in this context. In addition to showing an absence of object perception in this context, these experiments indicate that the choice profiles revealed earlier are not an artifact of the maze geometry; only visible objects revealed a significant choice profile. Finally, we also tested choice behavior for different contrasts of the attractive 60 deg bar. We observed a significant difference between the strongest contrasts (7 lx bar, 3279 lx background) compared with the last four visual stimuli with the lowest contrasts (Fig. 4D).

#### Pre-exposure affects choice behaviors

Habituation and pre-exposure can have an effect on valence-based decisions (Rangel et al., 2008). We therefore next investigated whether we could modulate the attractive and repulsive responses towards visual stimuli by pre-exposing the fly to these stimuli prior to running the virtual choice maze experiment. To test this, we pre-exposed flies to either a single 60 deg bar or a 26.25 deg bar for three consecutive 2 min trials (Fig. 5). For the attractive stimulus (60 deg), we found that pre-exposure resulted in a similar choice profile (Fig. 5B, left) to that for non-exposed flies (Fig. 2). The mean direction of both the attractive and aversive bar positions within the LED arena also seemed unchanged: the 60 deg bar was fixated and the 26.25 deg bar was anti-fixated (Fig. 5C, left). In contrast,

pre-exposure to the repulsive 26.25 deg bar (Fig. 5A, right) appeared to dampen the average choice profile of flies. The 60 deg bar was not chosen significantly above chance level, although the 26.25 deg bar was still chosen significantly below chance level (Fig. 5B, right, uncorrected data). Accordingly, there was no significant difference between the averaged proportioned choice for the 60 deg bar and the 26.25 deg bar (Fig. 5B, right). The overall positions of both bars within the arena during the experiment remained similar: the 60 deg bar was still significantly within the FVF, the 26.25 deg bar was positioned in the back of the arena, and the mean directions for the attractive and aversive bar were significantly different (Fig. 5C, right). However, the mean vector length of the aversive 26.25 deg stimulus was not significant (Fig. 5C, right, red arrow). By comparing the averaged proportioned choices of the pre-exposed datasets with the averaged proportioned choices of naive flies (Fig. 5D), we observed that pre-exposure to the attractive 60 deg bar resulted in an increase in choice of the 60 deg bar in the subsequent choice maze assay, which was not the case for the flies that were pre-exposed to the 26.25 deg bar (Fig. 5D, left). In contrast, choice of the 26.25 deg bar was unaffected by either pre-exposure condition (Fig. 5D, right). These results suggest that prior experience, even if relatively brief (6 min), can affect valence assignments in the subsequent recursive choice paradigm, particularly for attractive stimuli. However, innate object preferences still appear quite robust.

#### Activation of dNPF reduces anti-fixation towards a repulsive visual stimulus

In the preceding experiments, we attempted to query the fly's motivational state by examining effects of age, stimulus parameters and pre-exposure. We next attempted to modulate visual preferences by directly manipulating *Drosophila* brain circuits that have been associated with motivational states, such as neurons that express dNPF (Shao et al., 2017). dNPF has been associated with learning in *Drosophila* (Krashes et al., 2009) by, for example, altering feeding behavior (Chung et al., 2017), social behavior (Wu et al., 2003) and olfactory learning (Chung et al., 2017; Krashes et al., 2009; Shao et al., 2017). It is unclear, however, whether this neuropeptide also plays a role in gating information about the valence of visual stimuli. In the context of our recursive choice maze paradigm, we tested whether the previously established preference profile for object size could be modulated by acute activation of dNPF neurons, by expressing the red-shifted channelrhodopsin variant 'CsChrimson' (Klapoetke et al., 2014) in dNPF-expressing neurons (Fig. 6A). To ensure the optogenetic activation of the dNPF circuit was only associated with one object, we transiently activated dNPF-expressing neurons only when flies fixated on the small aversive (26.25 deg) bar, in the context of our recursive choice maze paradigm (Fig. 6B,C). The red light was off (i.e. NPF-expressing neurons were not activated) when the fly fixated on any other visual stimulus. Control animals were not fed retinal, a food supplement required for light-induced activation of the channelrhodopsin (see Materials and Methods).

We found that control flies displayed a similar preference profile to that of wild-type (CS) flies (Fig. 6D, upper panel), despite the red light turning on when the 26.25 deg bar happened to be in the fly's FVF. In contrast, optogenetic activation of dNPF-expressing neurons in retinal-fed flies led to a loss of repulsive behavior towards the 26.25 deg bar, while the larger bar remained attractive (Fig. 6D, lower panel). Activation of dNPF-expressing neurons had no effect on selection of the 60 deg bar, but selection for the 26.25 deg bar was significantly increased (Fig. 6E). This was also reflected by the vector length and orientation, which remained unchanged for the large bar but decreased (as a result of decreased

repulsion) for the smaller bar (Fig. 6F,G). Altered behavior toward the smaller bar was not due to altered walking speed, which remained unchanged (Fig. S1A). Increased attraction to the smaller bar was also evident in retinal-fed flies returning this object to their FVF more often, compared with controls, after a perturbation event (Fig. S1B). Thus, negative visual valence can be eliminated by acute dNPF circuit activation, and this manipulation increases the flies' motivation to fixate on an innately repulsive object.

#### Activation of dNPF neurons transiently reduces aversion and is a positive cue

As activation of the dNPF pathway is associated with olfactory learning in *Drosophila* (Krashes et al., 2009), we next tested whether operant activation of the dNPF circuit in our paradigm could result in visual learning. For this purpose, we devised a closed-loop learning assay (Fig. 7A) where we activated the dNPF neurons specifically during fixation of the smaller (26.25 deg) bar, which was in competition only with a larger (60 deg) bar (see Materials and Methods). We first confirmed our previous result showing that over three consecutive 2 min trials, flies chose the large bar significantly more often than the 26.25 deg bar, for both retinal-fed flies (+ATR) and controls (Fig. 7B, trial 1–3). Training began in trial 4, by turning on the red light only when the smaller bar was in the frontal visual field. Retinal-fed flies (+ATR) lost their aversive behavior towards the small bar by trial 5 (Fig. 7C, right), showing no significant difference in mean choice behavior in trials 5 and 6 and a general non-significant choice behavior for the training trials 4–6 (Fig. 7B). However, as soon as the dNPF circuit was no longer being activated (trial 7), flies returned to their innate preferences (Fig. 7C, right). This suggests that the 26.25 deg bar was rendered transiently attractive by the operant paradigm – and was at least equivalent in valence to the 60 deg bar – but that the valence effect did not persist beyond the training session in our experiments.

To ensure that we had altered valence rather than merely causing indifference to the competing bars, we devised a different operant learning experiment, where we optogenetically manipulated NPF-expressing neurons only when the flies placed an object (the 60 deg bar) in a specified quadrant of the arena (Fig. 8A). Flies were first tested for baseline fixation behavior, which for the larger bar is naturally directed towards the FVF (Fig. 8A,B, first panel from left). To test for operant learning, dNPF-expressing neurons were activated only when the bar was positioned by the fly to its right (between 60 and 120 deg; Fig. 8A, second panel). Accordingly, flies kept the bar significantly more often on their right side (Fig. 8B, second panel). We confirmed this result by activating the dNPF circuit when the bar was positioned behind the fly or to the left, with flies accordingly placing the bar in those respective quadrants in closed loop (Fig. 8A,B, third and fourth panels). This shows that activation of the dNPF circuit is indeed a positive or motivating cue, and not simply abolishing visual behavior. Additionally, after every experiment, we investigated whether flies continued to place the bars in the same locations, by testing the flies again in a 2 min trial without activating dNPF neurons (see Materials and Methods). However, flies immediately returned to keeping the stimulus in their FVF after the operant training (Fig. 8A,B, 1st trial LED off). We conclude that in this particular paradigm, activation of the dNPF circuit provides a transient positive cue that does not have a lasting effect on visual learning.

#### DISCUSSION

All animals display strong innate preferences, being attracted to some stimuli and repulsed by others, which influences their ultimate



decisions and actions. With odors, this easily relates to chemicals relevant to an animal's survival in a specific environment: the smell of rotten food is repulsive to humans but attractive to a fly. Visual stimuli are more difficult to assign valence, as these tend to be highly context dependent (Brembs and Wiener, 2006; Heisenberg et al., 2001; Gorostiza et al., 2017). Simple visual parameters, such as responses to light intensity (Menzel, 1979; Reichert and Bicker, 1979) and color (Menne and Spatz, 1977; Morante and Desplan, 2008), have been well studied in *D. melanogaster*. In contrast, fly responses to visual objects with multiple features are less well understood (Paulk et al., 2013). While there has been a considerable amount of research done on visual learning in tethered, closed-loop flight paradigms, these experiments are typically not concerned with uncovering innate preferences but rather focus on feature discrimination of visual objects of a possible equivalent valence such as an upright 'T' and an upside down 'T' (Heisenberg et al., 2001; Liu et al., 2006; Paulk et al., 2013). Indeed, most visual learning paradigms in animals are unaware of the larger valence landscape wherein experimental stimuli reside – or even whether they are attractive, aversive or neutral – but rather settle on robust responses that produce reliable behavioral readouts. For visual decision making, however, some knowledge about innate valence is important for better understanding of responses to different stimuli (Guitart-Masip et al., 2014).

In this study, we use a closed-loop visual paradigm for walking flies to show that flies find large bars innately attractive and smaller bars repulsive. This confirms previous work done in closed-loop flight (Maimon et al., 2008), indicating surprisingly entrenched valence effects for these simple visual objects. We used a virtual reality maze paradigm for walking flies, previously developed for walking honeybees (Van De Poll et al., 2015), to place these preferences within a larger valence spectrum for object size, particularly bars of different heights but the same width. In this paradigm, flies are able to reveal their visual preferences by iteratively selecting competing objects in a recurrent binary choice design. We found that visual preference profiles are remarkably robust, with larger bars remaining more attractive and smaller bars repulsive even as flies age. Further, changes to the background color did not alter choice behavior when the contrast between stimulus and background was high. Earlier studies have shown that these visual stimulus parameters can affect a fly's attention and therefore learning behavior (Koenig et al., 2016). An aversion towards smaller vertical objects in tethered flying fruit flies has previously been discussed as representing a possible hazard (Maimon et al., 2008; Park and Wasserman, 2018), whereas large vertical bars could represent a natural landmark. We did find, however, that flies fixate on innately repulsive objects if they are perceived as novel, suggesting that an internal switch exists for over-riding these deeply entrenched valence effects. This novelty effect was also observed in honeybees for innately aversive visual flickers (Van De Poll et al., 2015).

An interesting observation was made in older flies compared with younger flies. Whereas older flies displayed similar valence profiles to those of younger flies, and their fixation behavior was just as robust, they were less responsive to visual novelty. This conservative behavior in older flies has some parallels with human behavior: aging in humans affects decision making, resulting in less impulsive and delayed choice behavior, compared with younger participants (Eppinger et al., 2011, 2012). Such superficial similarities in valence-based decision making between older flies and older humans is not surprising considering the possibility of homologous systems being involved in decision

making in the two species (Barron and Klein, 2016; Barron et al., 2015; Bogacz and Gurney, 2007; Strausfeld and Hirth, 2013).

One important aspect of valence-based decision making is that it is not necessarily hard wired; it can be influenced by experience (Dayan and Abbott, 2003; Dickinson and Balleine, 2002; Rangel et al., 2008). This was observed to some extent in our experiments. A relatively short exposure to a repulsive or attractive 60 deg bar stimulus altered valence effects in the subsequent ~1 h in the virtual choice maze. Pre-exposure to the aversive 26.25 deg bar resulted in a more blunted valence profile, where we did not observe a significant difference in choice behavior between the attractive and aversive stimulus, whereas pre-exposure to the attractive 60 deg bar resulted in an increased choice of this bar in the subsequent multiple-choice assay. This can be interpreted as sensitization rather than habituation to a positive stimulus, in this case towards a stimulus with positive valence (Fischbach, 1981). This shows that even a brief visual experience can influence subsequent decision making over a long period of time. Typically, outside of virtual reality environments, it is impossible to ascertain an animal's exact previous experience.

We found that a neuromodulatory circuit in the fly brain might play a key role in governing visual decision making in our paradigm. NPY is a highly conserved neuropeptide (Wahlestedt and Reis, 1993; Feng et al., 2003) that regulates motivational state in animals (Bannon et al., 2000), and the fly homolog dNPF (Garczynski et al., 2002; Shao et al., 2017) seems to play a similar role. In mammals, there is also evidence that NPY plays a role in suppressing anxiety and fear (Fendt et al., 2009; Primeaux et al., 2005; Redrobe et al., 2002; Thorsell, 2000), as well as regulating responsiveness to aversive or stressful stimuli (Bannon et al., 2000; El Bahh et al., 2001). In flies, dNPF has been linked to olfactory learning by regulating dopaminergic input to the mushroom bodies (Krashes et al., 2009), with data suggesting that it may provide a rewarding cue (Rohwedder et al., 2015; Shao et al., 2017). The role of dNPF input to visual centers such as the CC is less clear, although recent studies similarly propose a reinforcing neuromodulatory role (Chung et al., 2017; Krashes et al., 2009; Shao et al., 2017). We found that optogenetic activation of dNPF-expressing neurons could indeed be used as a positive cue, which agrees with a recently published study (Shao et al., 2017): flies could be induced to 'place' a visual object at different positions in the arena, by only activating the NPF-expressing neurons when flies kept the object in that specified location. Flies innately fixate on objects in their frontal visual field (Guo et al., 2015; Heisenberg et al., 2001), so their capacity to also fixate to the sides suggests an attention-like effect (Sareen et al., 2011; Sun et al., 2017) which could possibly be linked to a positive cue. Consistent with this result, optogenetically activating the dNPF circuit during the presence of a repulsive object (the smaller bar) made it more attractive. Also, when random perturbations removed the smaller bar from the dNPF activation zone (the FVF), activated flies returned it more often to the FVF (Fig. S1B), suggesting an increased motivation to fixate on this object. However, the transient nature of any changes we were able to impose on innate visual fixation preferences suggests that other systems might need to be recruited to effectively transform these altered preferences into a more persistent memory.

#### Acknowledgements

We thank Leonie Kirszenblat, Lucy Heap, Chelsie Rohrsheib, Adam Hines, Kai Feng, Lisa Wittenhagen and Eva Maria Reuter for helpful comments on the manuscript. We thank James Reuben for helping with behavioral experiments. We thank the QBI microscopy facility for help with imaging.



**Competing interests**

The authors declare no competing or financial interests.

**Author contributions**

Conceptualization: M.J.G., J.S., M.V.D.P., B.v.S.; Methodology: M.J.G., J.S., J.A., M.V.D.P., B.v.S.; Software: M.J.G., J.S., M.V.D.P.; Validation: M.J.G., J.S., J.A., M.V.D.P.; Formal analysis: M.J.G., J.S., J.A., M.V.D.P.; Investigation: M.J.G., J.S., J.A., D.E.; Resources: M.J.G., D.E., B.v.S.; Data curation: M.J.G.; Writing - original draft: M.J.G., B.v.S.; Writing - review & editing: M.J.G., M.V.D.P., D.E., B.v.S.; Visualization: M.J.G., M.V.D.P., B.v.S.; Supervision: M.J.G., B.v.S.; Project administration: M.J.G., B.v.S.; Funding acquisition: M.J.G., B.v.S.

**Funding**

This work was supported by an Australian Research Council Discovery Project grant DP140103184 to B.v.S. and by Deutsche Forschungsgemeinschaft Research Fellowship GR 5030/1-1 to M.J.G.

**Data availability**

All data and code used for this study are available upon request from the corresponding author.

**Supplementary information**

Supplementary information available online at <http://jeb.biologists.org/lookup/doi/10.1242/jeb.185918.supplemental>

**References**

- Anderson, B. A., Laurent, P. A. and Yantis, S. (2014). Value-driven attentional priority signals in human basal ganglia and visual cortex. *Brain Res.* **1587**, 88-96.
- Balleine, B. W. and Dickinson, A. (1998). Goal-directed instrumental action: contingency and incentive learning and their cortical substrates. *Neuropharmacology* **37**, 407-419.
- Bannon, A. W., Seda, J., Carmouche, M., Francis, J. M., Norman, M. H., Karbon, B. and McCaleb, M. L. (2000). Behavioral characterization of neuropeptide Y knockout mice. *Brain Res.* **868**, 79-87.
- Barron, A. B. and Klein, C. (2016). What insects can tell us about the origins of consciousness. *Proc. Natl. Acad. Sci. USA* **113**, 4900-4908.
- Barron, A. B., Gurney, K. N., Meah, L. F. S., Vasilaki, E. and Marshall, J. A. R. (2015). Decision-making and action selection in insects: inspiration from vertebrate-based theories. *Front. Behav. Neurosci.* **9**, 216.
- Berens, P. (2009). CircStat: a MATLAB toolbox for circular statistics. *J. Stat. Softw.* **31**, 1-21.
- Bogacz, R. and Gurney, K. (2007). The basal ganglia and cortex implement optimal decision making between alternative actions. *Neural Comput.* **19**, 442-477.
- Brand, A. H. and Perrimon, N. (1993). Targeted gene expression as a means of altering cell fates and generating dominant phenotypes. *Development* **118**, 401-415.
- Brembs, B. and Wiener, J. (2006). Context and occasion setting in *Drosophila* visual learning. *Learn. Mem.* **13**, 618-628.
- Chung, B. Y., Ro, J., Hutter, S. A., Miller, K. M., Guduguntla, L. S., Kondo, S. and Pletcher, S. D. (2017). *Drosophila* neuropeptide F signaling independently regulates feeding and sleep-wake behavior. *Cell Rep.* **19**, 2441-2450.
- Dayan, P. and Abbott, L. F. (2003). Theoretical neuroscience: computational and mathematical modeling of neural systems. *J. Cogn. Neurosci.* **15**, 154-155.
- Dickinson, A. and Balleine, B. W. (2002). Steven's handbook of experimental psychology: learning, motivation and emotion. *Role Learn. Oper. Motiv. Syst.* **3**, 497-534.
- Dierick, H. A. and Greenspan, R. J. (2007). Serotonin and neuropeptide F have opposite modulatory effects on fly aggression. *Nat. Genet.* **39**, 678-682.
- Donlea, J. M., Thimman, M. S., Suzuki, Y., Gottschalk, L. and Shaw, P. J. (2011). Inducing sleep by remote control facilitates memory consolidation in *Drosophila*. *Science* **332**, 1571-1576.
- Donlea, J. M., Pimentel, D., Talbot, C. B., Kempf, A., Omoto, J. J., Hartenstein, V. and Miesenböck, G. (2018). Recurrent circuitry for balancing sleep need and sleep. *Neuron* **97**, 378-389.e4.
- El Bahh, B., Auvergne, R., Leré, C., Brana, C., Le Gal La Salle, G. and Rougier, A. (2001). Decreased epileptic susceptibility correlates with neuropeptide Y overexpression in a model of tolerance to excitotoxicity. *Brain Res.* **894**, 209-217.
- Eppinger, B., Hämmerer, D. and Li, S.-C. (2011). Neuromodulation of reward-based learning and decision making in human aging. *Ann. N. Y. Acad. Sci.* **1235**, 1-17.
- Eppinger, B., Nystrom, L. E. and Cohen, J. D. (2012). Reduced sensitivity to immediate reward during decision-making in older than younger adults. *PLoS ONE* **7**, e36953.
- Euston, D. R., Gruber, A. J. and McNaughton, B. L. (2012). The role of medial prefrontal cortex in memory and decision making. *Neuron* **76**, 1057-1070.
- Fendt, M., Bürki, H., Imobersteg, S., Lingenhöhl, K., McAllister, K. H., Orain, D., Uzunov, D. P. and Chaperon, F. (2009). Fear-reducing effects of intra-amygdala neuropeptide Y infusion in animal models of conditioned fear: an NPY Y1 receptor independent effect. *Psychopharmacology (Berl.)* **206**, 291-301.
- Feng, G., Reale, V., Chatwin, H., Kennedy, K., Venard, R., Ericsson, C., Yu, K., Evans, P. D. and Hall, L. M. (2003). Functional characterization of a neuropeptide F-like receptor from *Drosophila melanogaster*. *Eur. J. Neurosci.* **18**, 227-238.
- Fischbach, K. F. (1981). Habituation and sensitization of the landing response of *Drosophila melanogaster*. *Naturwissenschaften* **68**, 332.
- Foti, D., Weinberg, A., Dien, J. and Hajcak, G. (2011). Event-related potential activity in the basal ganglia differentiates rewards from nonrewards: Temporospatial principal components analysis and source localization of the feedback negativity. *Hum. Brain Mapp.* **32**, 2207-2216.
- Garbers, C. and Wachtler, T. (2016). Wavelength discrimination in *Drosophila* suggests a role of rhodopsin 1 in color vision. *PLoS ONE* **11**, e0155728.
- Garczynski, S. F., Brown, M. R., Shen, P., Murray, T. F. and Crim, J. W. (2002). Characterization of a functional neuropeptide F receptor from *Drosophila melanogaster*. *Peptides* **23**, 773-780.
- Gerfen, C. R. and Surmeier, D. J. (2011). Modulation of striatal projection systems by dopamine. *Annu. Rev. Neurosci.* **34**, 441-466.
- Gold, J. I. and Shadlen, M. N. (2007). The neural basis of decision making. *Annu. Rev. Neurosci.* **30**, 535-574.
- Gorostiza, E. A., Colomb, J. and Brembs, B. (2017). A decision underlies phototaxis in an insect. *Open Biol.* **6**, 160229.
- Götzsche, C. R. and Woldbye, D. P. D. (2016). The role of NPY in learning and memory. *Neuropeptides* **55**, 79-89.
- Guitart-Masip, M., Chowdhury, R., Sharot, T., Dayan, P., Duzel, E. and Dolan, R. J. (2012). Action controls dopaminergic enhancement of reward representations. *Proc. Natl. Acad. Sci. USA* **109**, 7511-7516.
- Guitart-Masip, M., Duzel, E., Dolan, R. and Dayan, P. (2014). Action versus valence in decision making. *Trends Cogn. Sci.* **18**, 194-202.
- Guo, C., Du, Y., Yuan, D., Li, M., Gong, H., Gong, Z. and Liu, L. (2015). A conditioned visual orientation requires the ellipsoid body in *Drosophila*. *Learn. Mem.* **22**, 56-63.
- Guo, A., Zhang, K., Ren, Q. Z., Su, H. F. and Chen, N. N. (2016). Functional connectivity mapping of decision-making in *Drosophila melanogaster*. In *Advances in Cognitive Neurodynamics (V): Proceedings of the Fifth International Conference on Cognitive Neurodynamics-2015* (ed. R. Wang and X. Pan), pp. 35-40. Singapore: Springer Singapore.
- Gurney, K., Prescott, T. J. and Redgrave, P. (2001). A computational model of action selection in the basal ganglia. I. A new functional anatomy. *Biol. Cybern.* **84**, 401-410.
- Hattori, D., Aso, Y., Swartz, K. J., Rubin, G. M., Abbott, L. F. and Axel, R. (2017). Representations of novelty and familiarity in a mushroom body compartment. *Cell* **169**, 956-969.e17.
- Heisenberg, M., Wolf, R. and Brembs, B. (2001). Flexibility in a single behavioral variable of *Drosophila*. *Learn. Mem.* **8**, 1-10.
- Ichinose, T., Aso, Y., Yamagata, N., Abe, A., Rubin, G. M. and Tanimoto, H. (2015). Reward signal in a recurrent circuit drives appetitive long-term memory formation. *Elife* **4**, e10719.
- Janak, P. H. and Tye, K. M. (2015). From circuits to behaviour in the amygdala. *Nature* **517**, 284.
- Kahsai, L. and Winther, A. M. (2011). Chemical neuroanatomy of the *Drosophila* central complex: distribution of multiple neuropeptides in relation to neurotransmitters. *J. Comp. Neurol.* **519**, 290-315.
- Keene, A. C. and Waddell, S. (2007). *Drosophila* olfactory memory: single genes to complex neural circuits. *Nat. Rev. Neurosci.* **8**, 341-354.
- Klapoetke, N. C., Murata, Y., Kim, S. S., Pulver, S. R., Birdsey-Benson, A., Cho, Y. K., Morimoto, T. K., Chuong, A. S., Carpenter, E. J. and Tian, Z. (2014). Independent optical excitation of distinct neural populations. *Nat. Methods* **11**, 338-346.
- Koenig, S., Wolf, R. and Heisenberg, M. (2016). Visual attention in flies—dopamine in the mushroom bodies mediates the after-effect of cueing. *PLoS ONE* **11**, e0161412.
- Krashes, M. J., DasGupta, S., Vreede, A., White, B., Armstrong, J. D. and Waddell, S. (2009). A neural circuit mechanism integrating motivational state with memory expression in *Drosophila*. *Cell* **139**, 416-427.
- Lee, D., McGreevy, B. P. and Barraclough, D. J. (2005). Learning and decision making in monkeys during a rock-paper-scissors game. *Cogn. Brain Res.* **25**, 416-430.
- Liu, G., Seiler, H., Wen, A., Zars, T., Ito, K., Wolf, R., Heisenberg, M. and Liu, L. (2006). Distinct memory traces for two visual features in the *Drosophila* brain. *Nature* **439**, 551-556.
- Liu, Q., Liu, S., Kodama, L., Driscoll, M. R. and Wu, M. N. (2012). Two dopaminergic neurons signal to the dorsal fan-shaped body to promote wakefulness in *Drosophila*. *Curr. Biol.* **22**, 2114-2123.
- Maimon, G., Straw, A. D. and Dickinson, M. H. (2008). A simple vision-based algorithm for decision making in flying *Drosophila*. *Curr. Biol.* **18**, 464-470.
- Menne, D. and Spatz, H.-C. (1977). Colour vision in *Drosophila melanogaster*. *J. Comp. Physiol.* **114**, 301-312.
- Menzel, R. (1979). Spectral sensitivity and color vision in invertebrates. In *Comparative Physiology and Evolution of Vision in Invertebrates: A*

- Invertebrate Photoreceptors* (ed. H. Autrum), pp. 503-580. Berlin, Heidelberg: Springer Berlin Heidelberg.
- Moore, R. J. D., Taylor, G. J., Paulk, A. C., Pearson, T., van Swinderen, B. and Srinivasan, M. V.** (2014). FicTrac: a visual method for tracking spherical motion and generating fictive animal paths. *J. Neurosci. Methods* **225**, 106-119.
- Morante, J. and Desplan, C.** (2008). The color-vision circuit in the medulla of *Drosophila*. *Curr. Biol.* **18**, 553-565.
- Nitz, D. A., van Swinderen, B., Tononi, G. and Greenspan, R. J.** (2002). Electrophysiological correlates of rest and activity in *Drosophila melanogaster*. *Curr. Biol.* **12**, 1934-1940.
- Odoemene, O., Pisupati, S., Nguyen, H. and Churchland, A. K.** (2018). Visual evidence accumulation guides decision-making in unrestrained mice. *J. Neurosci.* **38**, 3478-3517.
- O'Doherty, J. P., Cockburn, J. and Pauli, W. M.** (2017). Learning, reward, and decision making. *Annu. Rev. Psychol.* **68**, 73-100.
- Park, E. J. and Wasserman, S. M.** (2018). Diversity of visuomotor reflexes in two *Drosophila* species. *Curr. Biol.* **28**, R865-R866.
- Paulk, A., Millard, S. S. and van Swinderen, B.** (2013). Vision in *Drosophila*: seeing the world through a model's eyes. *Annu. Rev. Entomol.* **58**, 313-332.
- Paulk, A. C., Kirszenblat, L., Zhou, Y. and van Swinderen, B.** (2015). Closed-loop behavioral control increases coherence in the fly brain. *J. Neurosci.* **35**, 10304-10315.
- Primeaux, S. D., Wilson, S. P., Cusick, M. C., York, D. A. and Wilson, M. A.** (2005). Effects of altered amygdalar neuropeptide Y expression on anxiety-related behaviors. *Neuropsychopharmacology* **30**, 1589-1597.
- Rangel, A., Camerer, C. and Montague, P. R.** (2008). A framework for studying the neurobiology of value-based decision making. *Nat. Rev. Neurosci.* **9**, 545.
- Redondo, R. L., Kim, J., Arons, A. L., Ramirez, S., Liu, X. and Tonegawa, S.** (2014). Bidirectional switch of the valence associated with a hippocampal contextual memory engram. *Nature* **513**, 426.
- Redrobe, J. P., Dumont, Y. and Quirion, R.** (2002). Neuropeptide Y (NPY) and depression: from animal studies to the human condition. *Life Sci.* **71**, 2921-2937.
- Reichert, H. and Bicker, G.** (1979). A visual learning study of brightness perception in two mutants of *Drosophila melanogaster*. *J. Comp. Physiol.* **133**, 283-290.
- Rohwedder, A., Selcho, M., Chassot, B. and Thum, A. S.** (2015). Neuropeptide F neurons modulate sugar reward during associative olfactory learning of *Drosophila* larvae. *J. Comp. Neurol.* **523**, 2637-2664.
- Root, C. M., Masuyama, K., Green, D. S., Enell, L. E., Nässel, D. R., Lee, C.-H. and Wang, J. W.** (2008). A presynaptic gain control mechanism fine-tunes olfactory behavior. *Neuron* **59**, 311-321.
- Sareen, P., Wolf, R. and Heisenberg, M.** (2011). Attracting the attention of a fly. *Proc. Natl. Acad. Sci. USA* **108**, 7230-7235.
- Seelig, J. D. and Jayaraman, V.** (2015). Neural dynamics for landmark orientation and angular path integration. *Nature* **521**, 186-191.
- Shao, L., Saver, M., Chung, P., Ren, Q., Lee, T., Kent, C. F. and Heberlein, U.** (2017). Dissection of the *Drosophila* neuropeptide F circuit using a high-throughput two-choice assay. *Proc. Natl. Acad. Sci. USA* **114**, E8091-E8099.
- Smith, P. L. and Ratcliff, R.** (2009). An integrated theory of attention and decision making in visual signal detection. *Psychol. Rev.* **116**, 283-317.
- Stephenson-Jones, M., Samuelsson, E., Ericsson, J., Robertson, B. and Grillner, S.** (2011). Evolutionary conservation of the basal ganglia as a common vertebrate mechanism for action selection. *Curr. Biol.* **21**, 1081-1091.
- Strausfeld, N. J. and Hirth, F.** (2013). Deep homology of arthropod central complex and vertebrate basal ganglia. *Science* **340**, 157-161.
- Straw, A. D.** (2008). Vision egg: an open-source library for realtime visual stimulus generation. *Front. Neuroinform.* **2**, 4.
- Sun, Y., Nern, A., Franconville, R., Dana, H., Schreiter, E. R., Looger, L. L., Svoboda, K., Kim, D. S., Hermundstad, A. M. and Jayaraman, V.** (2017). Neural signatures of dynamic stimulus selection in *Drosophila*. *Nat. Neurosci.* **20**, 1104-1113.
- Thorsell, A.** (2000). Behavioral insensitivity to restraint stress, absent fear. *Proc. Natl. Acad. Sci. USA* **97**, 12852-12857.
- Tobler, P. N., O'Doherty, J. P., Dolan, R. J. and Schultz, W.** (2006). Human neural learning depends on reward prediction errors in the blocking paradigm. *J. Neurophysiol.* **95**, 301-310.
- Tully, T. and Quinn, W. G.** (1985). Classical conditioning and retention in normal and mutant *Drosophila melanogaster*. *J. Comp. Physiol. A* **157**, 263-277.
- Van De Poll, M. N., Zajackowski, E. L., Taylor, G. J., Srinivasan, M. V. and van Swinderen, B.** (2015). Using an abstract geometry in virtual reality to explore choice behaviour: visual flicker preferences in honeybees. *J. Exp. Biol.* **218**, 3448-3460.
- VanRullen, R. and Thorpe, S. J.** (2001). The time course of visual processing: from early perception to decision-making. *J. Cogn. Neurosci.* **13**, 454-461.
- Waddell, S.** (2010). Dopamine reveals neural circuit mechanisms of fly memory. *Trends Neurosci.* **33**, 457-464.
- Wahlestedt, C. and Reis, D. J.** (1993). Neuropeptide Y-related peptides and their receptors—are the receptors potential therapeutic drug targets? *Annu. Rev. Pharmacol. Toxicol.* **33**, 309-352.
- Watson, G. S. and Williams, E. J.** (1956). On the construction of significance tests on the circle and the sphere. *Biometrika* **43**, 344-352.
- Weir, P. T., Schnell, B. and Dickinson, M. H.** (2014). [div xmlns=http://www.w3.org/1999/xhtml](http://www.w3.org/1999/xhtml) Central complex neurons exhibit behaviorally gated responses to visual motion in *Drosophila*. *J. Neurophysiol.* **111**, 62-71.
- Wu, Q., Wen, T., Lee, G., Park, J. H., Cai, H. N. and Shen, P.** (2003). Developmental control of foraging and social behavior by the *Drosophila* neuropeptide Y-like system. *Neuron* **39**, 147-161.
- Xie, J. and Padoa-Schioppa, C.** (2016). Neuronal remapping and circuit persistence in economic decisions. *Nat. Neurosci.* **19**, 855-861.
- Zhang, K., Guo, J. Z., Peng, Y., Xi, W. and Guo, A.** (2007). Dopamine-mushroom body circuit regulates saliency-based decision-making in *Drosophila*. *Science* **316**, 1901-1904.
- Zhang, Z., Li, X., Guo, J., Li, Y. and Guo, A.** (2013). Two clusters of GABAergic ellipsoid body neurons modulate olfactory labile memory in *Drosophila*. *J. Neurosci.* **33**, 5175-5181.
